# Supplementary material for: Theoretical investigation on the mechanism of glucose-to-fructose isomerization synergistically catalyzed by MnCl2 and [C4SO3HMIM][CH3SO3] in [BMIM]Cl
Source: Royal Society of Chemistry journal article supplement (doi:10.1039/c8nj05988h), 2019-01-01
Supplement: c8nj05988h1.pdf [file c8nj05988h1.pdf]

## Supporting Information

### **Theoretical Investigation on the Mechanism of Glucose-to-Fructose**

#### **Isomerization Synergetically Catalyzed by MnCl<sub>2</sub> and**

#### **[C<sub>4</sub>SO<sub>3</sub>HMIM][CH<sub>3</sub>SO<sub>3</sub>] in [BMIM]Cl**

Yaru Jing,<sup>a</sup> Zhe Han,<sup>b</sup> Chengbu Liu,<sup>a</sup> and Dongju Zhang<sup>\*a</sup>

<sup>a</sup>Key Lab of Colloid and Interface Chemistry, Ministry of Education, Institute of Theoretical Chemistry, Shandong University, Jinan, 250100, P. R. China

<sup>b</sup>Qilu University of Technology (Shandong Academy of Sciences), Advanced Materials Institute, Shandong Engineering Research Centre for Municipal Sludge Disposal, Jinan, 250014, P.R. China

Corresponding author:

Dr & Professor Dongju Zhang

E-mail: zhangdj@sdu.edu.cn

Tel: +86-531-88365833

Fax: +86-531-88564464

**IM1**

|   |           |           |           |
|---|-----------|-----------|-----------|
| C | -1.082544 | 5.517113  | 1.653080  |
| C | 0.275342  | 5.499988  | 1.759443  |
| C | -0.317262 | 3.935319  | 0.309873  |
| N | -1.430405 | 4.537343  | 0.739574  |
| H | -1.822941 | 6.134327  | 2.136845  |
| H | 0.947466  | 6.099890  | 2.352484  |
| H | -0.253035 | 3.102830  | -0.385557 |
| N | 0.735541  | 4.513104  | 0.905898  |
| C | -2.792848 | 4.142693  | 0.368263  |
| H | -3.273899 | 3.677791  | 1.231412  |
| H | -3.347314 | 5.029837  | 0.052269  |
| H | -2.742517 | 3.413397  | -0.444646 |
| C | 2.132532  | 4.071058  | 0.726494  |
| H | 2.264613  | 3.827021  | -0.332102 |
| H | 2.770877  | 4.926685  | 0.964024  |
| C | 2.444991  | 2.852130  | 1.609288  |
| H | 1.582198  | 2.178650  | 1.600740  |
| H | 2.612104  | 3.157069  | 2.648706  |
| C | 3.664006  | 2.100940  | 1.062606  |
| H | 3.488599  | 1.789138  | 0.029279  |
| H | 4.589367  | 2.683020  | 1.099988  |
| S | 3.973362  | 0.610660  | 2.053721  |
| O | 4.832781  | -0.307513 | 1.041193  |
| O | 4.811703  | 0.955081  | 3.191950  |
| O | 2.678618  | -0.061771 | 2.275126  |
| C | 0.918723  | -3.304918 | -1.416193 |
| C | 1.470886  | -1.986097 | -1.956741 |
| C | 2.160944  | -1.257943 | -0.797734 |
| C | 2.802356  | -3.389319 | 0.241941  |
| C | 2.078461  | -4.143743 | -0.879974 |
| H | 2.677858  | -0.356319 | -1.139953 |
| H | 2.200572  | -2.180795 | -2.750892 |
| H | 0.236818  | -3.089294 | -0.589290 |
| H | 2.123458  | -3.279705 | 1.095251  |
| H | 2.796426  | -4.346234 | -1.689776 |
| O | 3.195614  | -2.063436 | -0.227095 |
| O | 1.140932  | -0.954614 | 0.122977  |
| O | 0.421130  | -1.165850 | -2.473404 |
| H | 0.861471  | -0.466783 | -3.025905 |
| O | 0.234189  | -4.067498 | -2.397182 |
| H | -0.672778 | -3.708490 | -2.409524 |
| O | 1.592596  | -5.356424 | -0.329510 |
| H | 0.906728  | -5.651055 | -0.955107 |

|    |           |           |           |
|----|-----------|-----------|-----------|
| C  | 4.092348  | -4.066788 | 0.693086  |
| H  | 4.516730  | -3.505072 | 1.540971  |
| H  | 3.848484  | -5.074764 | 1.037730  |
| O  | 5.034972  | -4.208677 | -0.356670 |
| H  | 5.197513  | -3.319654 | -0.710807 |
| H  | 4.239057  | -1.020100 | 0.655271  |
| H  | 1.507075  | -0.497184 | 0.911852  |
| S  | 1.454397  | 2.053192  | -2.648129 |
| C  | 0.345111  | 3.043433  | -3.662851 |
| H  | 0.102229  | 3.961697  | -3.123652 |
| H  | 0.864377  | 3.279564  | -4.593757 |
| H  | -0.565189 | 2.469381  | -3.845382 |
| O  | 1.821139  | 0.867437  | -3.479634 |
| O  | 0.644506  | 1.638279  | -1.427863 |
| O  | 2.591322  | 2.921659  | -2.258450 |
| Mn | -0.842389 | -0.054863 | -0.920247 |
| C  | -6.468918 | -1.686647 | -0.089894 |
| C  | -6.106232 | -1.697976 | 1.222061  |
| C  | -4.635208 | -0.471400 | 0.120483  |
| N  | -5.543357 | -0.906846 | -0.760401 |
| H  | -7.293607 | -2.157066 | -0.601589 |
| H  | -6.555287 | -2.178954 | 2.076339  |
| H  | -3.784512 | 0.148482  | -0.125270 |
| N  | -4.963192 | -0.924538 | 1.335802  |
| C  | -5.451468 | -0.730868 | -2.213283 |
| H  | -5.101380 | -1.663987 | -2.660686 |
| H  | -6.435689 | -0.460895 | -2.603336 |
| H  | -4.722493 | 0.054584  | -2.422382 |
| C  | -4.140645 | -0.763560 | 2.551871  |
| H  | -3.431030 | 0.042165  | 2.347101  |
| H  | -4.811227 | -0.452573 | 3.360728  |
| C  | -3.383206 | -2.048365 | 2.901436  |
| H  | -4.097514 | -2.855402 | 3.120613  |
| H  | -2.805288 | -2.354352 | 2.021610  |
| C  | -2.447151 | -1.835199 | 4.098618  |
| H  | -1.735015 | -1.039101 | 3.848494  |
| H  | -3.025927 | -1.482950 | 4.965725  |
| C  | -1.684913 | -3.109411 | 4.475771  |
| H  | -1.073814 | -3.462624 | 3.637424  |
| H  | -1.016489 | -2.932086 | 5.325406  |
| H  | -2.371355 | -3.919450 | 4.752863  |
| C1 | -2.551751 | 1.400398  | -2.085660 |
| C1 | -2.231158 | -2.131856 | -0.866571 |
| C1 | -1.218155 | 0.972623  | 1.331626  |

**TS<sub>1-2</sub>**

|   |           |           |           |
|---|-----------|-----------|-----------|
| C | 0.133111  | 5.535480  | -2.336722 |
| C | -1.214836 | 5.338577  | -2.386156 |
| C | -0.387319 | 4.015953  | -0.817427 |
| N | 0.628953  | 4.703820  | -1.348394 |
| H | 0.774452  | 6.189013  | -2.906613 |
| H | -1.973964 | 5.788771  | -3.006169 |
| H | -0.313744 | 3.264019  | -0.032954 |
| N | -1.521170 | 4.392937  | -1.425223 |
| C | 2.042105  | 4.531742  | -0.987448 |
| H | 2.531759  | 3.917848  | -1.745764 |
| H | 2.508718  | 5.517351  | -0.923305 |
| H | 2.114609  | 4.016467  | -0.026844 |
| C | -2.847102 | 3.807452  | -1.130034 |
| H | -2.887453 | 3.664075  | -0.046321 |
| H | -3.594954 | 4.554752  | -1.408990 |
| C | -3.041985 | 2.473444  | -1.869740 |
| H | -2.087365 | 1.939339  | -1.883515 |
| H | -3.330203 | 2.639092  | -2.913696 |
| C | -4.072936 | 1.588758  | -1.161622 |
| H | -3.818241 | 1.480940  | -0.102849 |
| H | -5.094574 | 1.974092  | -1.231496 |
| S | -4.115849 | -0.088905 | -1.883107 |
| O | -4.627299 | -0.980980 | -0.793001 |
| O | -4.894566 | -0.035908 | -3.119135 |
| O | -2.633690 | -0.401681 | -2.154923 |
| C | -0.376421 | -2.955257 | 1.549313  |
| C | -1.098750 | -1.689508 | 2.027971  |
| C | -1.912037 | -1.114691 | 0.881813  |
| C | -2.426416 | -3.762862 | 0.213627  |
| C | -1.357692 | -4.101985 | 1.257938  |
| H | -2.745810 | -0.448698 | 1.115851  |
| H | -1.755028 | -1.918961 | 2.873106  |
| H | 0.164489  | -2.715741 | 0.627186  |
| H | -1.948011 | -3.507106 | -0.739483 |
| H | -1.868389 | -4.372544 | 2.194558  |
| O | -3.138702 | -2.599203 | 0.725516  |
| O | -1.311371 | -1.017574 | -0.235934 |
| O | -0.153707 | -0.692599 | 2.432586  |
| H | -0.662468 | -0.028573 | 2.975253  |
| O | 0.522572  | -3.452096 | 2.521985  |
| H | 1.335337  | -2.909529 | 2.438114  |
| O | -0.625335 | -5.209246 | 0.755332  |
| H | 0.152705  | -5.265692 | 1.339919  |

|    |           |           |           |
|----|-----------|-----------|-----------|
| C  | -3.441693 | -4.885914 | 0.000054  |
| H  | -4.137292 | -4.589253 | -0.802273 |
| H  | -2.905530 | -5.780844 | -0.325261 |
| O  | -4.133348 | -5.227778 | 1.187412  |
| H  | -4.559291 | -4.416492 | 1.508892  |
| H  | -3.739779 | -2.191498 | 0.032768  |
| H  | -1.939107 | -0.645880 | -1.127684 |
| S  | -1.378030 | 2.387298  | 2.539665  |
| C  | -0.447647 | 3.577104  | 3.516353  |
| H  | -0.283981 | 4.471554  | 2.912180  |
| H  | -1.037509 | 3.819277  | 4.402551  |
| H  | 0.512617  | 3.132990  | 3.785152  |
| O  | -1.656360 | 1.231350  | 3.446161  |
| O  | -0.446803 | 1.966358  | 1.407827  |
| O  | -2.575073 | 3.076984  | 2.010216  |
| Mn | 1.280140  | 0.574221  | 1.163420  |
| C  | 6.483499  | -1.230398 | -0.739594 |
| C  | 5.812343  | -1.838864 | -1.756128 |
| C  | 4.510291  | -0.258147 | -0.929913 |
| N  | 5.655236  | -0.239783 | -0.240148 |
| H  | 7.464197  | -1.412648 | -0.329349 |
| H  | 6.096646  | -2.653423 | -2.403031 |
| H  | 3.651640  | 0.382971  | -0.777260 |
| N  | 4.583619  | -1.210325 | -1.865968 |
| C  | 5.912109  | 0.589934  | 0.941693  |
| H  | 6.066778  | -0.063116 | 1.803037  |
| H  | 6.796752  | 1.208295  | 0.768868  |
| H  | 5.038220  | 1.215705  | 1.139015  |
| C  | 3.462249  | -1.615063 | -2.739470 |
| H  | 2.726775  | -0.808079 | -2.688288 |
| H  | 3.848054  | -1.674010 | -3.763070 |
| C  | 2.836694  | -2.940538 | -2.290866 |
| H  | 3.579464  | -3.747502 | -2.369536 |
| H  | 2.565621  | -2.852173 | -1.232450 |
| C  | 1.599633  | -3.289162 | -3.129542 |
| H  | 0.853096  | -2.493206 | -3.010319 |
| H  | 1.868866  | -3.304967 | -4.196019 |
| C  | 0.984158  | -4.638079 | -2.739913 |
| H  | 0.659994  | -4.652251 | -1.692712 |
| H  | 0.109628  | -4.860417 | -3.361573 |
| H  | 1.702974  | -5.455953 | -2.876572 |
| C1 | 2.784344  | 2.296215  | 1.994074  |
| C1 | 2.733750  | -1.426467 | 1.315833  |
| C1 | 1.335594  | 1.062417  | -1.259484 |

**IM2**

|   |            |            |            |
|---|------------|------------|------------|
| C | 2. 552673  | 4. 808761  | -2. 416828 |
| C | 1. 235276  | 5. 151844  | -2. 469802 |
| C | 1. 505743  | 3. 731403  | -0. 794074 |
| N | 2. 700168  | 3. 925185  | -1. 361774 |
| H | 3. 388825  | 5. 114750  | -3. 025491 |
| H | 0. 701938  | 5. 814816  | -3. 132703 |
| H | 1. 282375  | 3. 070084  | 0. 040422  |
| N | 0. 599930  | 4. 476380  | -1. 443144 |
| C | 3. 936800  | 3. 236868  | -0. 974663 |
| H | 4. 193558  | 2. 508282  | -1. 746519 |
| H | 4. 734441  | 3. 975425  | -0. 864233 |
| H | 3. 776726  | 2. 707864  | -0. 031536 |
| C | -0. 845492 | 4. 468038  | -1. 141467 |
| H | -0. 945333 | 4. 377074  | -0. 055317 |
| H | -1. 242286 | 5. 441579  | -1. 443292 |
| C | -1. 551958 | 3. 306519  | -1. 859086 |
| H | -0. 919875 | 2. 416757  | -1. 785296 |
| H | -1. 686789 | 3. 528071  | -2. 923532 |
| C | -2. 900417 | 3. 015014  | -1. 195534 |
| H | -2. 762348 | 2. 718741  | -0. 152852 |
| H | -3. 584152 | 3. 869959  | -1. 223425 |
| S | -3. 816029 | 1. 676090  | -2. 024716 |
| O | -4. 674688 | 1. 039201  | -1. 009037 |
| O | -4. 398316 | 2. 183014  | -3. 258962 |
| O | -2. 654981 | 0. 649458  | -2. 447104 |
| C | -1. 618899 | -2. 438469 | 1. 565845  |
| C | -1. 752657 | -1. 005017 | 2. 098367  |
| C | -2. 214256 | -0. 048509 | 1. 009229  |
| C | -3. 855937 | -2. 494918 | 0. 247523  |
| C | -2. 957952 | -3. 152491 | 1. 299570  |
| H | -2. 885073 | 0. 774884  | 1. 293541  |
| H | -2. 430620 | -0. 971581 | 2. 956413  |
| H | -1. 053781 | -2. 403062 | 0. 626268  |
| H | -3. 287623 | -2. 360935 | -0. 683272 |
| H | -3. 520900 | -3. 204722 | 2. 244176  |
| O | -4. 244793 | -1. 214205 | 0. 787196  |
| O | -1. 700791 | -0. 103427 | -0. 106332 |
| O | -0. 454339 | -0. 530407 | 2. 515906  |
| H | -0. 622653 | 0. 283217  | 3. 063433  |
| O | -0. 947904 | -3. 263584 | 2. 504320  |
| H | 0. 009422  | -3. 075839 | 2. 403572  |
| O | -2. 655768 | -4. 461002 | 0. 832864  |
| H | -1. 930578 | -4. 754462 | 1. 415833  |

|    |           |           |           |
|----|-----------|-----------|-----------|
| C  | -5.125961 | -3.303274 | -0.034980 |
| H  | -5.658468 | -2.835179 | -0.881496 |
| H  | -4.860151 | -4.324349 | -0.317656 |
| O  | -5.954394 | -3.382468 | 1.111324  |
| H  | -6.014223 | -2.473317 | 1.451597  |
| H  | -4.543715 | -0.626940 | 0.061750  |
| H  | -2.222252 | 0.314572  | -1.602822 |
| S  | -0.295938 | 2.805688  | 2.568760  |
| C  | 1.046808  | 3.547566  | 3.508177  |
| H  | 1.545193  | 4.286326  | 2.877363  |
| H  | 0.617362  | 4.028430  | 4.389231  |
| H  | 1.752500  | 2.762762  | 3.786790  |
| O  | -0.994393 | 1.873251  | 3.503128  |
| O  | 0.379066  | 2.032977  | 1.439612  |
| O  | -1.129120 | 3.903918  | 2.029945  |
| Mn | 1.333782  | 0.042824  | 1.189334  |
| C  | 5.412724  | -3.709584 | -0.734433 |
| C  | 4.535545  | -4.016880 | -1.729338 |
| C  | 3.973023  | -2.044396 | -0.910751 |
| N  | 5.048446  | -2.468825 | -0.239325 |
| H  | 6.252422  | -4.256950 | -0.336242 |
| H  | 4.463745  | -4.884767 | -2.365276 |
| H  | 3.438198  | -1.116655 | -0.756159 |
| N  | 3.648541  | -2.958548 | -1.831116 |
| C  | 5.639735  | -1.792285 | 0.919676  |
| H  | 5.558375  | -2.447438 | 1.789504  |
| H  | 6.688797  | -1.563812 | 0.713900  |
| H  | 5.079937  | -0.876661 | 1.125827  |
| C  | 2.439242  | -2.903120 | -2.679318 |
| H  | 2.075093  | -1.873663 | -2.626931 |
| H  | 2.750764  | -3.113786 | -3.708297 |
| C  | 1.361087  | -3.882024 | -2.201428 |
| H  | 1.745573  | -4.910892 | -2.253417 |
| H  | 1.146025  | -3.670065 | -1.147795 |
| C  | 0.081456  | -3.765854 | -3.040735 |
| H  | -0.303786 | -2.740372 | -2.964829 |
| H  | 0.320438  | -3.928780 | -4.102154 |
| C  | -1.002038 | -4.757648 | -2.601866 |
| H  | -1.311223 | -4.591869 | -1.563366 |
| H  | -1.893236 | -4.663949 | -3.232544 |
| H  | -0.646879 | -5.792728 | -2.684006 |
| C1 | 3.443705  | 1.003660  | 1.966044  |
| C1 | 1.880547  | -2.361644 | 1.324747  |
| C1 | 1.578551  | 0.437263  | -1.252387 |

**IM3**

|   |            |            |            |
|---|------------|------------|------------|
| C | -4. 932567 | 2. 821662  | 0. 424543  |
| C | -5. 811947 | 1. 858185  | 0. 040058  |
| C | -4. 408754 | 0. 960007  | 1. 489608  |
| N | -4. 072200 | 2. 242974  | 1. 336648  |
| H | -4. 818898 | 3. 843733  | 0. 104004  |
| H | -6. 628798 | 1. 886520  | -0. 663086 |
| H | -3. 845551 | 0. 253045  | 2. 088594  |
| N | -5. 474864 | 0. 701364  | 0. 720992  |
| C | -2. 909988 | 2. 892524  | 1. 958419  |
| H | -2. 228440 | 3. 207720  | 1. 168201  |
| H | -2. 394768 | 2. 167131  | 2. 588077  |
| H | -3. 248359 | 3. 744880  | 2. 552574  |
| C | -6. 110848 | -0. 613112 | 0. 521303  |
| H | -7. 110160 | -0. 402486 | 0. 132424  |
| H | -6. 235666 | -1. 076290 | 1. 505130  |
| C | -5. 350086 | -1. 536287 | -0. 446264 |
| H | -6. 065670 | -2. 264117 | -0. 843359 |
| H | -4. 963285 | -0. 949240 | -1. 283782 |
| C | -4. 205219 | -2. 290490 | 0. 230979  |
| H | -4. 562469 | -2. 912472 | 1. 059761  |
| H | -3. 412455 | -1. 639179 | 0. 612556  |
| S | -3. 393521 | -3. 467739 | -0. 881911 |
| O | -2. 641559 | -2. 503891 | -1. 944607 |
| O | -4. 403506 | -4. 190718 | -1. 644575 |
| O | -2. 390754 | -4. 191175 | -0. 092055 |
| C | 2. 392983  | -3. 467460 | 0. 921757  |
| C | 0. 166556  | -2. 729524 | -0. 099188 |
| C | 1. 004398  | -2. 815294 | 1. 151023  |
| C | 4. 496002  | -3. 616240 | -0. 546477 |
| C | 3. 341312  | -2. 722026 | -0. 050366 |
| H | 2. 227573  | -4. 482203 | 0. 549767  |
| H | 5. 247947  | -2. 925001 | -0. 954091 |
| H | 2. 789043  | -2. 369110 | -0. 931511 |
| O | 5. 092916  | -4. 404068 | 0. 488415  |
| O | 1. 132325  | -1. 550415 | 1. 786509  |
| O | -0. 385816 | -1. 698308 | -0. 466088 |
| H | -1. 875124 | -2. 057400 | -1. 499435 |
| O | 3. 047731  | -3. 574536 | 2. 182838  |
| H | 3. 349120  | -2. 658241 | 2. 356262  |
| O | 3. 896962  | -1. 603501 | 0. 641912  |
| H | 3. 365630  | -0. 822670 | 0. 372389  |
| C | 4. 092324  | -4. 608044 | -1. 651299 |
| H | 5. 009258  | -4. 974980 | -2. 138606 |



|    |           |           |           |
|----|-----------|-----------|-----------|
| H  | 3.477330  | -4.123723 | -2.417644 |
| O  | 3.341367  | -5.692979 | -1.123881 |
| H  | 3.868475  | -5.975936 | -0.353057 |
| H  | 4.643890  | -4.186008 | 1.328570  |
| H  | 0.432025  | -1.482704 | 2.472603  |
| S  | -2.028472 | 1.621018  | -1.528090 |
| C  | -1.165892 | 1.122532  | -3.030646 |
| H  | -0.643770 | 0.183573  | -2.840545 |
| H  | -0.441589 | 1.894779  | -3.294670 |
| H  | -1.907294 | 1.003460  | -3.823260 |
| O  | -2.591823 | 2.973409  | -1.765566 |
| O  | -3.009198 | 0.550586  | -1.228099 |
| O  | -0.937657 | 1.707614  | -0.461561 |
| Mn | 0.153355  | 0.388309  | 0.774595  |
| C  | 2.257089  | 5.982217  | -0.733470 |
| C  | 3.386116  | 5.412779  | -0.228795 |
| C  | 1.844674  | 3.837245  | -0.373888 |
| N  | 1.304532  | 4.979910  | -0.818516 |
| H  | 2.044978  | 6.997227  | -1.030151 |
| H  | 4.350159  | 5.838070  | 0.001220  |
| H  | 1.348365  | 2.880803  | -0.312489 |
| N  | 3.109166  | 4.075484  | -0.010714 |
| C  | -0.070419 | 5.138596  | -1.301133 |
| H  | -0.058923 | 5.410804  | -2.359706 |
| H  | -0.562741 | 5.926989  | -0.726337 |
| H  | -0.617221 | 4.203817  | -1.174138 |
| C  | 4.047822  | 3.069434  | 0.533263  |
| H  | 3.432289  | 2.253018  | 0.913569  |
| H  | 4.549301  | 3.539290  | 1.385349  |
| C  | 5.051106  | 2.587688  | -0.517504 |
| H  | 5.636757  | 3.441078  | -0.890551 |
| H  | 4.495251  | 2.172883  | -1.366102 |
| C  | 5.995260  | 1.517885  | 0.049406  |
| H  | 5.409516  | 0.644010  | 0.359344  |
| H  | 6.490282  | 1.903023  | 0.952538  |
| C  | 7.054266  | 1.078335  | -0.966607 |
| H  | 6.586046  | 0.662122  | -1.866333 |
| H  | 7.706241  | 0.306498  | -0.543959 |
| H  | 7.687374  | 1.919180  | -1.277316 |
| H  | 0.459578  | -3.511304 | 1.808242  |
| Cl | -1.636744 | -0.597841 | 2.402076  |
| Cl | 0.976102  | 2.076034  | 2.286101  |
| Cl | 2.051342  | 0.414421  | -0.905462 |
| H  | 0.031381  | -3.663129 | -0.665231 |

**TS<sub>3-4</sub>**

|   |            |            |            |
|---|------------|------------|------------|
| C | 5. 148827  | -2. 857817 | -0. 229472 |
| C | 5. 910007  | -1. 783579 | -0. 572123 |
| C | 4. 643997  | -1. 202371 | 1. 141264  |
| N | 4. 375582  | -2. 476811 | 0. 848477  |
| H | 5. 052656  | -3. 831812 | -0. 679183 |
| H | 6. 635922  | -1. 652407 | -1. 358564 |
| H | 4. 114284  | -0. 625142 | 1. 888857  |
| N | 5. 586891  | -0. 757907 | 0. 299854  |
| C | 3. 373011  | -3. 308536 | 1. 525202  |
| H | 2. 740979  | -3. 758682 | 0. 759322  |
| H | 2. 766451  | -2. 666611 | 2. 165565  |
| H | 3. 877319  | -4. 076804 | 2. 117566  |
| C | 6. 148954  | 0. 605579  | 0. 261013  |
| H | 7. 120637  | 0. 515012  | -0. 231643 |
| H | 6. 333613  | 0. 913937  | 1. 294643  |
| C | 5. 274168  | 1. 632000  | -0. 469740 |
| H | 5. 891718  | 2. 524284  | -0. 626014 |
| H | 4. 989785  | 1. 249010  | -1. 455002 |
| C | 4. 023923  | 2. 023719  | 0. 316482  |
| H | 4. 265913  | 2. 341015  | 1. 336189  |
| H | 3. 289956  | 1. 215894  | 0. 367717  |
| S | 3. 180462  | 3. 444854  | -0. 431186 |
| O | 2. 708969  | 2. 976050  | -1. 787745 |
| O | 4. 123138  | 4. 565106  | -0. 476822 |
| O | 2. 008448  | 3. 691833  | 0. 526418  |
| C | -1. 649095 | 3. 597638  | 0. 540642  |
| C | -0. 024585 | 2. 423749  | -1. 039064 |
| C | -0. 481738 | 2. 646936  | 0. 262153  |
| C | -4. 112632 | 4. 132732  | 0. 010039  |
| C | -3. 023381 | 3. 037924  | 0. 078726  |
| H | -1. 463855 | 4. 544038  | 0. 027914  |
| H | -5. 070917 | 3. 607887  | 0. 143100  |
| H | -2. 917478 | 2. 593654  | -0. 918870 |
| O | -3. 975535 | 5. 156406  | 0. 998044  |
| O | -0. 338329 | 1. 601913  | 1. 181075  |
| O | 0. 769319  | 1. 436852  | -1. 316292 |
| H | 1. 590634  | 1. 824881  | -1. 789270 |
| O | -1. 717291 | 3. 863991  | 1. 936479  |
| H | -2. 116001 | 3. 049970  | 2. 307996  |
| O | -3. 435981 | 2. 035764  | 1. 006873  |
| H | -3. 062757 | 1. 186675  | 0. 684440  |
| C | -4. 136963 | 4. 867903  | -1. 335374 |
| H | -5. 052493 | 5. 477589  | -1. 383089 |

|    |           |           |           |
|----|-----------|-----------|-----------|
| H  | -4.158329 | 4.160263  | -2.170972 |
| O  | -2.982392 | 5.681522  | -1.501734 |
| H  | -2.962862 | 6.225003  | -0.693115 |
| H  | -3.325754 | 4.856559  | 1.663160  |
| H  | 0.442269  | 1.734552  | 1.764276  |
| S  | 1.769010  | -2.015470 | -1.506186 |
| C  | 0.831345  | -1.644582 | -3.000907 |
| H  | 0.257532  | -0.732628 | -2.830430 |
| H  | 0.157680  | -2.477639 | -3.210350 |
| H  | 1.540342  | -1.517640 | -3.821746 |
| O  | 2.379114  | -3.356849 | -1.691883 |
| O  | 2.714367  | -0.893480 | -1.305041 |
| O  | 0.708146  | -2.093048 | -0.402601 |
| Mn | -0.168496 | -0.741178 | 0.952396  |
| C  | -2.991931 | -5.824060 | -0.313603 |
| C  | -4.081296 | -5.113395 | 0.090418  |
| C  | -2.432832 | -3.684980 | -0.249581 |
| N  | -1.971058 | -4.911154 | -0.523375 |
| H  | -2.849279 | -6.883167 | -0.458791 |
| H  | -5.071980 | -5.435862 | 0.369343  |
| H  | -1.876881 | -2.762151 | -0.319775 |
| N  | -3.713124 | -3.781019 | 0.123127  |
| C  | -0.598106 | -5.221437 | -0.934254 |
| H  | -0.584886 | -5.538596 | -1.980381 |
| H  | -0.212770 | -6.024802 | -0.302340 |
| H  | 0.020739  | -4.332352 | -0.806175 |
| C  | -4.550302 | -2.642607 | 0.560319  |
| H  | -3.869545 | -1.933444 | 1.035604  |
| H  | -5.221797 | -3.033193 | 1.331020  |
| C  | -5.326705 | -1.998359 | -0.589758 |
| H  | -6.004623 | -2.736740 | -1.042236 |
| H  | -4.614185 | -1.685140 | -1.361384 |
| C  | -6.122965 | -0.777215 | -0.108311 |
| H  | -5.427544 | -0.033560 | 0.301362  |
| H  | -6.788954 | -1.071526 | 0.715633  |
| C  | -6.949197 | -0.138325 | -1.228860 |
| H  | -6.305393 | 0.197427  | -2.050369 |
| H  | -7.502120 | 0.732774  | -0.860963 |
| H  | -7.678160 | -0.845759 | -1.643765 |
| H  | 0.671895  | 3.298048  | 0.284351  |
| Cl | 1.755686  | -0.087368 | 2.409142  |
| Cl | -1.431176 | -2.151187 | 2.399654  |
| Cl | -2.050710 | -0.269191 | -0.718873 |
| H  | -0.134351 | 3.232419  | -1.766295 |

**IM4**

|   |            |            |            |
|---|------------|------------|------------|
| C | 6. 041177  | 1. 931217  | -0. 842425 |
| C | 6. 396222  | 0. 685751  | -1. 258622 |
| C | 4. 222624  | 0. 921713  | -1. 578950 |
| N | 4. 687042  | 2. 060975  | -1. 059444 |
| H | 6. 621802  | 2. 717324  | -0. 387807 |
| H | 7. 350850  | 0. 184554  | -1. 258032 |
| H | 3. 180720  | 0. 745126  | -1. 830816 |
| N | 5. 248015  | 0. 066275  | -1. 718133 |
| C | 3. 859401  | 3. 201789  | -0. 642494 |
| H | 3. 715664  | 3. 157170  | 0. 437675  |
| H | 2. 886461  | 3. 139413  | -1. 128168 |
| H | 4. 363647  | 4. 125686  | -0. 932443 |
| C | 5. 198400  | -1. 299754 | -2. 275245 |
| H | 6. 242731  | -1. 593762 | -2. 401823 |
| H | 4. 754677  | -1. 240567 | -3. 274425 |
| C | 4. 472206  | -2. 339636 | -1. 407567 |
| H | 4. 857800  | -3. 317921 | -1. 717105 |
| H | 4. 720576  | -2. 197695 | -0. 351241 |
| C | 2. 950875  | -2. 343195 | -1. 591185 |
| H | 2. 667225  | -2. 299700 | -2. 647457 |
| H | 2. 446312  | -1. 539073 | -1. 051679 |
| S | 2. 243936  | -3. 903337 | -0. 986178 |
| O | 2. 284128  | -3. 927283 | 0. 476056  |
| O | 2. 818444  | -4. 987771 | -1. 774201 |
| O | 0. 699847  | -3. 744094 | -1. 465480 |
| C | -2. 594107 | -2. 712149 | 0. 391799  |
| C | -0. 276558 | -1. 916543 | 0. 979047  |
| C | -1. 342153 | -1. 898130 | 0. 159372  |
| C | -4. 941039 | -2. 683579 | 1. 524251  |
| C | -3. 604219 | -1. 950012 | 1. 297541  |
| H | -2. 353835 | -3. 658255 | 0. 884402  |
| H | -5. 574231 | -1. 973532 | 2. 073370  |
| H | -3. 121847 | -1. 851461 | 2. 282024  |
| O | -5. 619538 | -3. 014488 | 0. 309259  |
| O | -1. 481684 | -1. 053153 | -0. 908539 |
| O | 0. 713100  | -0. 971872 | 0. 847695  |
| H | 1. 586950  | -1. 256289 | 1. 232168  |
| O | -3. 178843 | -3. 048241 | -0. 880066 |
| H | -2. 914293 | -2. 336270 | -1. 489921 |
| O | -3. 899676 | -0. 660172 | 0. 776584  |
| H | -3. 166965 | -0. 071162 | 1. 049757  |
| C | -4. 822154 | -3. 965814 | 2. 363612  |
| H | -5. 832272 | -4. 247659 | 2. 700701  |

|    |           |           |           |
|----|-----------|-----------|-----------|
| H  | -4.205497 | -3.802633 | 3.254935  |
| O  | -4.225152 | -5.026864 | 1.632638  |
| H  | -4.712305 | -5.043678 | 0.789375  |
| H  | -4.936448 | -3.025454 | -0.391692 |
| H  | -0.651505 | -0.556815 | -1.105977 |
| S  | 3.555429  | 0.289016  | 2.132466  |
| C  | 3.584024  | 0.243522  | 3.930228  |
| H  | 2.608082  | -0.088874 | 4.288482  |
| H  | 3.801048  | 1.248718  | 4.295824  |
| H  | 4.363623  | -0.454922 | 4.240483  |
| O  | 4.870276  | 0.777003  | 1.674575  |
| O  | 3.215620  | -1.095606 | 1.673847  |
| O  | 2.436190  | 1.266281  | 1.806096  |
| Mn | 0.614305  | 1.486206  | 0.822646  |
| C  | -3.674340 | 5.427504  | -1.016921 |
| C  | -4.003935 | 4.379780  | -1.822714 |
| C  | -2.819247 | 3.591005  | -0.131698 |
| N  | -2.937303 | 4.914577  | 0.034143  |
| H  | -3.886477 | 6.481428  | -1.102897 |
| H  | -4.558724 | 4.345358  | -2.746693 |
| H  | -2.304571 | 2.911202  | 0.543705  |
| N  | -3.462802 | 3.241662  | -1.251534 |
| C  | -2.361346 | 5.672329  | 1.151930  |
| H  | -3.034648 | 5.635165  | 2.012140  |
| H  | -2.227501 | 6.706598  | 0.831271  |
| H  | -1.388830 | 5.236251  | 1.395403  |
| C  | -3.592129 | 1.867348  | -1.785370 |
| H  | -2.861045 | 1.244563  | -1.265999 |
| H  | -3.300772 | 1.913278  | -2.839671 |
| C  | -5.007838 | 1.305694  | -1.618869 |
| H  | -5.741796 | 2.027839  | -2.005032 |
| H  | -5.211318 | 1.160221  | -0.552526 |
| C  | -5.165627 | -0.032057 | -2.352987 |
| H  | -4.404967 | -0.724279 | -1.976882 |
| H  | -4.969940 | 0.115574  | -3.425177 |
| C  | -6.549559 | -0.656620 | -2.151206 |
| H  | -6.686811 | -0.963403 | -1.109738 |
| H  | -6.666707 | -1.550894 | -2.773471 |
| H  | -7.349913 | 0.043662  | -2.422910 |
| H  | 0.177077  | -3.343702 | -0.723835 |
| Cl | 0.775745  | 1.014707  | -1.636401 |
| Cl | 0.646153  | 3.904497  | 0.662381  |
| Cl | -1.531036 | 1.234128  | 1.948811  |
| H  | -0.204592 | -2.609080 | 1.811375  |

**IM5**

|   |            |            |            |
|---|------------|------------|------------|
| C | 5. 492778  | 3. 762157  | -0. 058469 |
| C | 4. 242671  | 3. 924957  | -0. 576891 |
| C | 4. 336435  | 1. 920879  | 0. 348677  |
| N | 5. 531482  | 2. 501309  | 0. 513179  |
| H | 6. 348723  | 4. 418503  | -0. 053997 |
| H | 3. 801403  | 4. 749361  | -1. 114678 |
| H | 4. 086466  | 0. 914204  | 0. 649912  |
| N | 3. 538950  | 2. 763210  | -0. 312868 |
| C | 6. 675646  | 1. 866642  | 1. 176950  |
| H | 6. 463986  | 0. 799277  | 1. 261119  |
| H | 7. 568845  | 2. 020113  | 0. 567395  |
| H | 6. 823068  | 2. 308424  | 2. 166002  |
| C | 2. 144022  | 2. 462076  | -0. 690251 |
| H | 2. 033846  | 2. 663910  | -1. 756308 |
| H | 2. 007943  | 1. 392712  | -0. 526789 |
| C | 1. 158243  | 3. 262195  | 0. 169602  |
| H | 1. 204604  | 4. 333539  | -0. 058172 |
| H | 1. 436038  | 3. 123714  | 1. 220224  |
| C | -0. 278922 | 2. 756924  | 0. 047464  |
| H | -0. 321175 | 1. 672245  | 0. 176744  |
| H | -0. 909953 | 3. 219064  | 0. 813213  |
| S | -1. 133653 | 3. 161535  | -1. 493656 |
| O | -2. 448232 | 2. 511690  | -1. 442515 |
| O | -1. 007782 | 4. 592324  | -1. 747127 |
| O | -0. 236744 | 2. 438026  | -2. 640588 |
| C | -1. 759152 | -1. 510281 | -2. 659848 |
| C | -0. 480479 | -0. 781959 | -2. 329177 |
| C | 0. 451460  | -0. 492850 | -3. 260042 |
| C | -4. 261684 | -1. 722952 | -2. 303409 |
| C | -2. 971615 | -1. 030189 | -1. 833605 |
| H | 0. 209165  | -0. 601831 | -4. 313655 |
| H | -1. 978390 | -1. 352861 | -3. 724432 |
| H | -4. 078194 | -2. 803713 | -2. 343333 |
| H | -3. 095736 | 0. 053317  | -1. 906903 |
| O | -4. 521456 | -1. 198983 | -3. 620861 |
| O | 1. 715814  | -0. 064004 | -3. 036745 |
| O | -0. 154601 | -0. 648373 | -0. 979400 |
| H | -1. 000425 | -0. 724775 | -0. 473262 |
| O | -1. 662427 | -2. 904354 | -2. 363326 |
| H | -0. 717008 | -3. 177049 | -2. 301607 |
| O | -2. 717819 | -1. 309540 | -0. 441859 |
| H | -2. 404872 | -2. 241222 | -0. 390553 |
| C | -5. 479537 | -1. 436127 | -1. 425314 |

|    |           |           |           |
|----|-----------|-----------|-----------|
| H  | -6.317538 | -2.067413 | -1.769754 |
| H  | -5.272511 | -1.694251 | -0.383443 |
| O  | -5.833268 | -0.063635 | -1.468653 |
| H  | -5.737284 | 0.195224  | -2.402766 |
| H  | -5.000426 | -1.874512 | -4.124202 |
| H  | 2.091023  | -0.453744 | -2.215915 |
| S  | 4.129652  | -1.678827 | 0.043846  |
| C  | 4.883819  | -2.826379 | -1.110920 |
| H  | 4.072735  | -3.337101 | -1.634858 |
| H  | 5.507964  | -2.257060 | -1.802851 |
| H  | 5.488294  | -3.533994 | -0.539976 |
| O  | 5.220474  | -0.977451 | 0.765355  |
| O  | 3.245438  | -2.515008 | 0.938309  |
| O  | 3.272700  | -0.737767 | -0.763447 |
| Mn | 1.198420  | -2.120681 | 0.370430  |
| C  | -1.963021 | 0.008730  | 5.304020  |
| C  | -3.014610 | 0.587987  | 4.660814  |
| C  | -2.025942 | -0.796829 | 3.248035  |
| N  | -1.365142 | -0.857700 | 4.409343  |
| H  | -1.593114 | 0.132992  | 6.309541  |
| H  | -3.743213 | 1.305415  | 5.002440  |
| H  | -1.774612 | -1.394484 | 2.376089  |
| N  | -3.039853 | 0.069384  | 3.376618  |
| C  | -0.154481 | -1.655737 | 4.648322  |
| H  | 0.723771  | -1.043166 | 4.436163  |
| H  | -0.167529 | -1.998434 | 5.685015  |
| H  | -0.162077 | -2.503657 | 3.961984  |
| C  | -4.048931 | 0.380605  | 2.340822  |
| H  | -3.826297 | -0.254576 | 1.479782  |
| H  | -5.023018 | 0.084142  | 2.745889  |
| C  | -4.055625 | 1.859235  | 1.939581  |
| H  | -4.043667 | 2.491458  | 2.839132  |
| H  | -3.140120 | 2.079586  | 1.378844  |
| C  | -5.284393 | 2.204493  | 1.086180  |
| H  | -5.331579 | 1.535067  | 0.219389  |
| H  | -6.192599 | 2.014897  | 1.677521  |
| C  | -5.273988 | 3.659848  | 0.608652  |
| H  | -4.418910 | 3.845323  | -0.049724 |
| H  | -6.184172 | 3.889114  | 0.043763  |
| H  | -5.219692 | 4.362165  | 1.450954  |
| H  | -0.457330 | 1.472792  | -2.714264 |
| C1 | 1.035995  | -0.035047 | 1.837034  |
| C1 | -0.721538 | -3.248786 | 1.394299  |
| C1 | 1.374724  | -3.493013 | -1.667079 |

**TS<sub>5-6</sub>**

|   |            |            |            |
|---|------------|------------|------------|
| C | -2. 731453 | 5. 100558  | 1. 172403  |
| C | -1. 509023 | 5. 261579  | 0. 592381  |
| C | -1. 689090 | 3. 150789  | 1. 220888  |
| N | -2. 822664 | 3. 775878  | 1. 564269  |
| H | -3. 534272 | 5. 802518  | 1. 338850  |
| H | -1. 043596 | 6. 129795  | 0. 155386  |
| H | -1. 468194 | 2. 106514  | 1. 419219  |
| N | -0. 874107 | 4. 032419  | 0. 635694  |
| C | -3. 958429 | 3. 140929  | 2. 238846  |
| H | -3. 769593 | 2. 067508  | 2. 327615  |
| H | -4. 083734 | 3. 580663  | 3. 232383  |
| H | -4. 863183 | 3. 305170  | 1. 648272  |
| C | 0. 473779  | 3. 688490  | 0. 136171  |
| H | 1. 205487  | 4. 201858  | 0. 764152  |
| H | 0. 582304  | 2. 619471  | 0. 308490  |
| C | 0. 667274  | 4. 025738  | -1. 358006 |
| H | 1. 175291  | 4. 988153  | -1. 476226 |
| H | -0. 316630 | 4. 101218  | -1. 833601 |
| C | 1. 414382  | 2. 931740  | -2. 131576 |
| H | 0. 857254  | 1. 994049  | -2. 063271 |
| H | 1. 510334  | 3. 200947  | -3. 187064 |
| S | 3. 109037  | 2. 598117  | -1. 578234 |
| O | 3. 482798  | 1. 314230  | -2. 288258 |
| O | 3. 949924  | 3. 753080  | -1. 895023 |
| O | 2. 990758  | 2. 367563  | -0. 061413 |
| C | 4. 107875  | -1. 479075 | -0. 063401 |
| C | 2. 797020  | -0. 726270 | -0. 148756 |
| C | 2. 220385  | 0. 014592  | 0. 884048  |
| C | 6. 468570  | -1. 614287 | 0. 859772  |
| C | 5. 240598  | -0. 710548 | 0. 639690  |
| H | 2. 534489  | -0. 157915 | 1. 911134  |
| H | 3. 884457  | -2. 389431 | 0. 512447  |
| H | 6. 842960  | -1. 931265 | -0. 120548 |
| H | 4. 899674  | -0. 369339 | 1. 623941  |
| O | 6. 028209  | -2. 749107 | 1. 631625  |
| O | 0. 881273  | 0. 362937  | 0. 689960  |
| O | 2. 207794  | -0. 655920 | -1. 335748 |
| H | 2. 718470  | 0. 061288  | -1. 905714 |
| O | 4. 588340  | -1. 792685 | -1. 359125 |
| H | 3. 830842  | -2. 094192 | -1. 894111 |
| O | 5. 599508  | 0. 441340  | -0. 098324 |
| H | 5. 520287  | 0. 221004  | -1. 043752 |
| C | 7. 566825  | -0. 891471 | 1. 646230  |



|    |           |           |           |
|----|-----------|-----------|-----------|
| H  | 8.486158  | -1.503614 | 1.623942  |
| H  | 7.785004  | 0.075670  | 1.187848  |
| O  | 7.147681  | -0.650103 | 2.979138  |
| H  | 6.763846  | -1.493450 | 3.276208  |
| H  | 6.571899  | -3.512243 | 1.387368  |
| H  | 0.326026  | 0.287483  | 1.516790  |
| S  | -2.164756 | -0.697258 | 2.091182  |
| C  | -1.836246 | -2.077541 | 3.195264  |
| H  | -0.869613 | -2.499200 | 2.915470  |
| H  | -1.834166 | -1.708698 | 4.223394  |
| H  | -2.627763 | -2.816451 | 3.058201  |
| O  | -3.524507 | -0.185437 | 2.389084  |
| O  | -2.027887 | -1.258650 | 0.703765  |
| O  | -1.089462 | 0.319990  | 2.404735  |
| Mn | -0.348401 | -1.029148 | -0.772271 |
| C  | -4.080435 | -4.163835 | 0.283187  |
| C  | -4.892826 | -3.072090 | 0.186363  |
| C  | -3.371854 | -2.934389 | -1.402859 |
| N  | -3.138472 | -4.059703 | -0.721474 |
| H  | -4.091572 | -4.994367 | 0.971130  |
| H  | -5.734481 | -2.771055 | 0.786236  |
| H  | -2.741016 | -2.566280 | -2.208459 |
| N  | -4.434360 | -2.317544 | -0.875392 |
| C  | -1.978179 | -4.938670 | -0.927706 |
| H  | -1.245577 | -4.758562 | -0.137954 |
| H  | -2.315385 | -5.977637 | -0.933053 |
| H  | -1.514364 | -4.675588 | -1.880411 |
| C  | -4.902448 | -0.987471 | -1.332139 |
| H  | -4.005968 | -0.371122 | -1.466311 |
| H  | -5.383408 | -1.123330 | -2.306092 |
| C  | -5.857477 | -0.318565 | -0.345411 |
| H  | -6.766820 | -0.924646 | -0.223308 |
| H  | -5.368003 | -0.241303 | 0.632104  |
| C  | -6.252086 | 1.080441  | -0.840920 |
| H  | -5.345385 | 1.692100  | -0.931284 |
| H  | -6.677945 | 1.008977  | -1.853223 |
| C  | -7.261639 | 1.766776  | 0.083275  |
| H  | -6.868584 | 1.858226  | 1.104541  |
| H  | -7.508824 | 2.772075  | -0.276220 |
| H  | -8.197842 | 1.198782  | 0.144127  |
| H  | 2.840532  | 1.111127  | 0.414590  |
| C1 | -1.565604 | 1.066227  | -1.403443 |
| C1 | -0.551405 | -2.181928 | -2.888232 |
| C1 | 0.742936  | -2.874283 | 0.557846  |

**IM6**

|   |            |            |            |
|---|------------|------------|------------|
| C | 0. 220820  | 5. 677869  | -2. 129227 |
| C | -0. 728736 | 5. 255848  | -1. 247283 |
| C | 1. 154280  | 4. 216425  | -0. 762000 |
| N | 1. 391719  | 5. 013804  | -1. 810176 |
| H | 0. 165968  | 6. 379977  | -2. 946141 |
| H | -1. 772349 | 5. 511210  | -1. 163806 |
| H | 1. 880957  | 3. 534753  | -0. 343472 |
| N | -0. 121969 | 4. 349659  | -0. 395102 |
| C | 2. 677628  | 5. 104608  | -2. 506966 |
| H | 3. 243831  | 4. 198310  | -2. 281886 |
| H | 2. 490676  | 5. 162139  | -3. 581131 |
| H | 3. 222918  | 5. 994265  | -2. 179949 |
| C | -0. 775879 | 3. 493865  | 0. 621487  |
| H | -1. 258746 | 2. 667859  | 0. 097595  |
| H | 0. 016674  | 3. 062369  | 1. 235595  |
| C | -1. 779764 | 4. 265543  | 1. 480797  |
| H | -2. 594018 | 4. 661281  | 0. 863565  |
| H | -1. 279716 | 5. 121517  | 1. 952322  |
| C | -2. 368833 | 3. 401120  | 2. 602603  |
| H | -1. 584693 | 2. 878102  | 3. 156075  |
| H | -2. 952782 | 4. 010140  | 3. 296480  |
| S | -3. 557483 | 2. 127593  | 1. 999712  |
| O | -3. 002627 | 0. 779499  | 2. 673894  |
| O | -4. 862262 | 2. 382499  | 2. 597413  |
| O | -3. 435041 | 2. 062918  | 0. 535844  |
| C | -3. 535443 | -2. 547432 | -0. 408147 |
| C | -2. 370197 | -1. 609006 | -0. 129722 |
| C | -2. 062053 | -0. 459343 | -1. 059313 |
| C | -5. 960859 | -2. 794097 | -1. 130922 |
| C | -4. 851966 | -1. 813964 | -0. 709020 |
| H | -1. 912517 | -0. 859742 | -2. 070388 |
| H | -3. 249872 | -3. 146475 | -1. 288056 |
| H | -6. 155390 | -3. 475689 | -0. 292858 |
| H | -4. 709623 | -1. 099564 | -1. 526280 |
| O | -5. 475362 | -3. 523342 | -2. 276420 |
| O | -0. 914429 | 0. 207448  | -0. 572457 |
| O | -1. 666596 | -1. 833572 | 0. 850453  |
| H | -2. 005266 | 0. 676461  | 2. 534562  |
| O | -3. 755970 | -3. 375003 | 0. 719783  |
| H | -2. 942050 | -3. 320693 | 1. 258652  |
| O | -5. 256143 | -1. 072397 | 0. 427147  |
| H | -5. 071423 | -1. 643739 | 1. 195152  |
| C | -7. 243919 | -2. 059701 | -1. 534719 |

|    |           |           |           |
|----|-----------|-----------|-----------|
| H  | -8.062356 | -2.794419 | -1.639326 |
| H  | -7.524959 | -1.340629 | -0.761291 |
| O  | -7.046043 | -1.341805 | -2.741185 |
| H  | -6.575799 | -1.964695 | -3.323671 |
| H  | -5.898599 | -4.394806 | -2.280483 |
| H  | -0.369317 | 0.609533  | -1.292645 |
| S  | 2.316616  | 0.994382  | -1.468897 |
| C  | 2.934423  | -0.050955 | -2.794850 |
| H  | 2.258072  | -0.906708 | -2.873161 |
| H  | 2.944962  | 0.537870  | -3.714218 |
| H  | 3.946346  | -0.378041 | -2.545845 |
| O  | 3.294912  | 2.107598  | -1.285508 |
| O  | 2.226320  | 0.114373  | -0.247254 |
| O  | 0.976326  | 1.486698  | -1.931431 |
| Mn | 0.508074  | -1.029307 | 0.737541  |
| C  | 5.199697  | -4.609342 | 0.308786  |
| C  | 5.724966  | -3.508515 | 0.912253  |
| C  | 3.810521  | -2.919728 | -0.021418 |
| N  | 4.007654  | -4.217773 | -0.278121 |
| H  | 5.555989  | -5.625650 | 0.252061  |
| H  | 6.629679  | -3.379325 | 1.484889  |
| H  | 2.946635  | -2.357041 | -0.345853 |
| N  | 4.847473  | -2.461332 | 0.690438  |
| C  | 3.039693  | -5.093036 | -0.946730 |
| H  | 2.202020  | -4.480174 | -1.290507 |
| H  | 3.523336  | -5.593313 | -1.789768 |
| H  | 2.674120  | -5.831801 | -0.229461 |
| C  | 4.960033  | -1.098472 | 1.244667  |
| H  | 3.943558  | -0.713520 | 1.333496  |
| H  | 5.365360  | -1.205699 | 2.255355  |
| C  | 5.829221  | -0.175884 | 0.388217  |
| H  | 6.836441  | -0.602750 | 0.276155  |
| H  | 5.395135  | -0.110035 | -0.616684 |
| C  | 5.916306  | 1.232390  | 0.990716  |
| H  | 4.899860  | 1.620018  | 1.125796  |
| H  | 6.373752  | 1.175868  | 1.988701  |
| C  | 6.708455  | 2.199306  | 0.106350  |
| H  | 6.208007  | 2.327508  | -0.859842 |
| H  | 6.788729  | 3.186104  | 0.576380  |
| H  | 7.727219  | 1.835701  | -0.079034 |
| H  | -2.923464 | 0.221722  | -1.053784 |
| C1 | 0.040614  | 0.727300  | 2.512144  |
| C1 | 1.688256  | -2.589300 | 2.117686  |
| C1 | 0.637339  | -2.476937 | -1.485694 |

**IM7**

|   |            |            |            |
|---|------------|------------|------------|
| C | 2. 377413  | 4. 104059  | 2. 330988  |
| C | 2. 621983  | 4. 501266  | 1. 052050  |
| C | 0. 792392  | 3. 255911  | 1. 049501  |
| N | 1. 228438  | 3. 335330  | 2. 309730  |
| H | 2. 925208  | 4. 284325  | 3. 242251  |
| H | 3. 438740  | 5. 069069  | 0. 637731  |
| H | -0. 101043 | 2. 725381  | 0. 735046  |
| N | 1. 621907  | 3. 958841  | 0. 264500  |
| C | 0. 608048  | 2. 663796  | 3. 461567  |
| H | -0. 405128 | 2. 367791  | 3. 185426  |
| H | 1. 174619  | 1. 764691  | 3. 709018  |
| H | 0. 592425  | 3. 361179  | 4. 301920  |
| C | 1. 419630  | 4. 151034  | -1. 183501 |
| H | 0. 592914  | 3. 492758  | -1. 463144 |
| H | 1. 112696  | 5. 191634  | -1. 335613 |
| C | 2. 642068  | 3. 856600  | -2. 059862 |
| H | 3. 489318  | 4. 498299  | -1. 795289 |
| H | 2. 341551  | 4. 154327  | -3. 071734 |
| C | 3. 108845  | 2. 396322  | -2. 141779 |
| H | 2. 283795  | 1. 678271  | -2. 066093 |
| H | 3. 626359  | 2. 225623  | -3. 090220 |
| S | 4. 366004  | 1. 926135  | -0. 912082 |
| O | 3. 529158  | 1. 549226  | 0. 399623  |
| O | 5. 026441  | 0. 716603  | -1. 429935 |
| O | 5. 168929  | 3. 099719  | -0. 573805 |
| C | 3. 327721  | -2. 024415 | 1. 453961  |
| C | 2. 309241  | -1. 705242 | 0. 362707  |
| C | 1. 327487  | -2. 783359 | -0. 037809 |
| C | 5. 388398  | -2. 387874 | -0. 039072 |
| C | 4. 469258  | -2. 980820 | 1. 028864  |
| H | 1. 829287  | -3. 388173 | -0. 810446 |
| H | 3. 776124  | -1. 071141 | 1. 771899  |
| H | 5. 831945  | -1. 461788 | 0. 348834  |
| H | 4. 024323  | -3. 905966 | 0. 630916  |
| O | 4. 586701  | -2. 124844 | -1. 198689 |
| O | 0. 148264  | -2. 189120 | -0. 552022 |
| O | 2. 240277  | -0. 597779 | -0. 166209 |
| O | 2. 696370  | -2. 683148 | 2. 542494  |
| H | 1. 932405  | -2. 130761 | 2. 819824  |
| O | 5. 254929  | -3. 253304 | 2. 174334  |
| H | 4. 620475  | -3. 465462 | 2. 881450  |
| C | 6. 501624  | -3. 356986 | -0. 452316 |
| H | 7. 233983  | -2. 807243 | -1. 066567 |

|    |           |           |           |
|----|-----------|-----------|-----------|
| H  | 7.012964  | -3.751545 | 0.429149  |
| O  | 5.963717  | -4.459991 | -1.163621 |
| H  | 5.389877  | -4.058040 | -1.839423 |
| H  | 4.698038  | -1.186334 | -1.439444 |
| S  | -2.998182 | -2.537813 | -1.222953 |
| C  | -2.636752 | -2.115639 | -2.940317 |
| H  | -3.321211 | -1.328153 | -3.260595 |
| H  | -1.605082 | -1.763973 | -3.004618 |
| H  | -2.781742 | -3.012540 | -3.546087 |
| O  | -2.059876 | -3.645039 | -0.874533 |
| O  | -4.435534 | -2.855919 | -1.140822 |
| O  | -2.654274 | -1.270898 | -0.442521 |
| Mn | -0.905655 | -0.309712 | 0.249400  |
| H  | 3.061764  | 0.647794  | 0.253857  |
| Cl | 0.217226  | -0.724639 | 2.416028  |
| Cl | -2.223975 | 1.603509  | 1.351063  |
| H  | 1.123218  | -3.423632 | 0.824757  |
| Cl | -0.424640 | 1.132020  | -1.717490 |
| C  | -5.738950 | 0.592619  | -2.770457 |
| C  | -6.240151 | -0.141695 | -1.738107 |
| C  | -4.527342 | 1.020434  | -0.969299 |
| N  | -4.664195 | 1.311468  | -2.269354 |
| H  | -6.036714 | 0.657883  | -3.804999 |
| H  | -7.039136 | -0.864389 | -1.709014 |
| H  | -3.753778 | 1.396451  | -0.299893 |
| N  | -5.476775 | 0.148602  | -0.623936 |
| C  | -3.789120 | 2.219303  | -3.016776 |
| H  | -2.774755 | 2.141680  | -2.614602 |
| H  | -3.781190 | 1.909542  | -4.063286 |
| H  | -4.158224 | 3.246208  | -2.942956 |
| C  | -5.595029 | -0.479659 | 0.708744  |
| H  | -5.520315 | -1.557599 | 0.544311  |
| H  | -4.711359 | -0.167512 | 1.269822  |
| C  | -6.885459 | -0.078787 | 1.426125  |
| H  | -6.918967 | 1.013743  | 1.534277  |
| H  | -7.757375 | -0.363518 | 0.819863  |
| C  | -6.986198 | -0.741460 | 2.807320  |
| H  | -6.937063 | -1.832375 | 2.689994  |
| H  | -6.111547 | -0.457761 | 3.407389  |
| C  | -8.268375 | -0.360882 | 3.553649  |
| H  | -8.311352 | -0.845922 | 4.534723  |
| H  | -8.328031 | 0.722397  | 3.714335  |
| H  | -9.160900 | -0.664081 | 2.992590  |
| H  | -0.554114 | -2.887541 | -0.651034 |

**TS<sub>7-8</sub>**

|   |            |            |            |
|---|------------|------------|------------|
| C | 2. 596339  | 4. 137640  | 2. 111155  |
| C | 2. 858187  | 4. 480325  | 0. 820266  |
| C | 0. 964215  | 3. 339685  | 0. 856093  |
| N | 1. 407787  | 3. 431455  | 2. 113906  |
| H | 3. 156226  | 4. 314468  | 3. 015676  |
| H | 3. 701463  | 4. 993508  | 0. 387596  |
| H | 0. 039318  | 2. 850823  | 0. 560843  |
| N | 1. 826998  | 3. 973445  | 0. 051468  |
| C | 0. 751404  | 2. 837984  | 3. 288018  |
| H | -0. 234803 | 2. 477438  | 2. 991435  |
| H | 1. 339028  | 1. 991287  | 3. 646777  |
| H | 0. 664337  | 3. 601821  | 4. 064354  |
| C | 1. 653182  | 4. 112397  | -1. 405961 |
| H | 0. 786392  | 3. 499674  | -1. 668338 |
| H | 1. 416632  | 5. 163441  | -1. 605430 |
| C | 2. 866589  | 3. 694555  | -2. 245215 |
| H | 3. 769921  | 4. 238423  | -1. 945300 |
| H | 2. 637200  | 4. 033368  | -3. 263071 |
| C | 3. 167047  | 2. 191667  | -2. 318971 |
| H | 2. 256275  | 1. 583770  | -2. 281260 |
| H | 3. 694508  | 1. 968597  | -3. 250585 |
| S | 4. 297093  | 1. 567385  | -1. 040673 |
| O | 3. 519787  | 1. 481573  | 0. 255679  |
| O | 4. 631454  | 0. 174053  | -1. 542194 |
| O | 5. 443738  | 2. 481616  | -0. 978120 |
| C | 3. 354026  | -1. 776270 | 1. 679601  |
| C | 2. 406658  | -1. 664887 | 0. 470007  |
| C | 1. 381378  | -2. 785473 | 0. 328597  |
| C | 4. 802448  | -2. 556460 | -0. 107003 |
| C | 4. 368938  | -2. 862154 | 1. 323582  |
| H | 1. 842468  | -3. 635505 | -0. 187499 |
| H | 3. 883347  | -0. 813536 | 1. 771030  |
| H | 5. 585590  | -1. 792459 | -0. 093745 |
| H | 3. 862192  | -3. 837391 | 1. 363551  |
| O | 3. 608325  | -1. 963453 | -0. 732869 |
| O | 0. 249343  | -2. 304521 | -0. 369642 |
| O | 1. 892315  | -0. 488368 | 0. 158626  |
| O | 2. 717588  | -2. 148280 | 2. 873254  |
| H | 1. 903942  | -1. 600073 | 2. 993884  |
| O | 5. 511365  | -2. 854721 | 2. 153889  |
| H | 5. 195611  | -3. 023352 | 3. 057105  |
| C | 5. 232623  | -3. 762094 | -0. 934112 |
| H | 5. 631600  | -3. 424132 | -1. 900952 |

|    |           |           |           |
|----|-----------|-----------|-----------|
| H  | 6.036368  | -4.274212 | -0.395286 |
| O  | 4.183907  | -4.702021 | -1.105062 |
| H  | 3.542283  | -4.301287 | -1.712820 |
| H  | 3.905053  | -1.027954 | -1.123750 |
| S  | -2.934005 | -2.643384 | -0.877660 |
| C  | -2.650505 | -2.535478 | -2.657802 |
| H  | -3.326946 | -1.788297 | -3.076747 |
| H  | -1.612685 | -2.243645 | -2.830500 |
| H  | -2.855808 | -3.516017 | -3.092448 |
| O  | -2.003435 | -3.705922 | -0.390457 |
| O  | -4.371629 | -2.903457 | -0.680844 |
| O  | -2.524083 | -1.274256 | -0.347913 |
| Mn | -0.754651 | -0.294575 | 0.292789  |
| H  | 2.527672  | 0.294209  | 0.317104  |
| Cl | -0.043754 | -0.685679 | 2.639965  |
| Cl | -2.051045 | 1.796425  | 1.149004  |
| H  | 1.116585  | -3.097766 | 1.344315  |
| Cl | -0.303022 | 0.982321  | -1.818033 |
| C  | -5.542789 | 0.368242  | -2.896362 |
| C  | -6.050004 | -0.150586 | -1.743046 |
| C  | -4.244808 | 1.009426  | -1.223171 |
| N  | -4.410258 | 1.089475  | -2.549928 |
| H  | -5.873744 | 0.282284  | -3.919265 |
| H  | -6.890868 | -0.802937 | -1.572718 |
| H  | -3.432203 | 1.441744  | -0.641572 |
| N  | -5.232687 | 0.271263  | -0.712359 |
| C  | -3.513095 | 1.805882  | -3.460715 |
| H  | -2.501013 | 1.779997  | -3.045643 |
| H  | -3.516921 | 1.295037  | -4.425453 |
| H  | -3.853094 | 2.837183  | -3.592173 |
| C  | -5.341137 | -0.120826 | 0.709695  |
| H  | -5.303655 | -1.213112 | 0.728026  |
| H  | -4.437738 | 0.253539  | 1.196337  |
| C  | -6.603094 | 0.437707  | 1.369934  |
| H  | -6.602843 | 1.533186  | 1.289965  |
| H  | -7.497993 | 0.081473  | 0.839321  |
| C  | -6.686842 | 0.024372  | 2.845902  |
| H  | -6.668338 | -1.071493 | 2.916446  |
| H  | -5.790355 | 0.380371  | 3.370042  |
| C  | -7.939782 | 0.564148  | 3.542182  |
| H  | -7.971733 | 0.253525  | 4.592103  |
| H  | -7.966715 | 1.660410  | 3.518092  |
| H  | -8.853812 | 0.198005  | 3.058400  |
| H  | -0.481036 | -2.982392 | -0.322603 |

**IM8**

|   |            |            |            |
|---|------------|------------|------------|
| C | 2. 670190  | 3. 788382  | 2. 507449  |
| C | 2. 893956  | 4. 330621  | 1. 279047  |
| C | 1. 026050  | 3. 147310  | 1. 178067  |
| N | 1. 498466  | 3. 058388  | 2. 425516  |
| H | 3. 242405  | 3. 847139  | 3. 419768  |
| H | 3. 701589  | 4. 948465  | 0. 920701  |
| H | 0. 097172  | 2. 694210  | 0. 834554  |
| N | 1. 857735  | 3. 915861  | 0. 460718  |
| C | 0. 879248  | 2. 277738  | 3. 509747  |
| H | -0. 132145 | 2. 001051  | 3. 206517  |
| H | 1. 453743  | 1. 365764  | 3. 680588  |
| H | 0. 857460  | 2. 892766  | 4. 412004  |
| C | 1. 641526  | 4. 274928  | -0. 951788 |
| H | 0. 747466  | 3. 731860  | -1. 269532 |
| H | 1. 436768  | 5. 350228  | -0. 988053 |
| C | 2. 811035  | 3. 947943  | -1. 889611 |
| H | 3. 742247  | 4. 420451  | -1. 555326 |
| H | 2. 560558  | 4. 431426  | -2. 841093 |
| C | 3. 042295  | 2. 457653  | -2. 190555 |
| H | 2. 118905  | 1. 867852  | -2. 124205 |
| H | 3. 468058  | 2. 334850  | -3. 190043 |
| S | 4. 266556  | 1. 672462  | -1. 118455 |
| O | 3. 695609  | 1. 437872  | 0. 229044  |
| O | 4. 447570  | 0. 262870  | -1. 855435 |
| O | 5. 518024  | 2. 414894  | -1. 211381 |
| C | 3. 187433  | -2. 045844 | 1. 689163  |
| C | 2. 402152  | -1. 802406 | 0. 371042  |
| C | 1. 326206  | -2. 870620 | 0. 103482  |
| C | 4. 702308  | -2. 435361 | -0. 106816 |
| C | 4. 302724  | -2. 991073 | 1. 255596  |
| H | 1. 780987  | -3. 678471 | -0. 481436 |
| H | 3. 650065  | -1. 080348 | 1. 964678  |
| H | 5. 436515  | -1. 632390 | 0. 040329  |
| H | 3. 885801  | -4. 002416 | 1. 142448  |
| O | 3. 473339  | -1. 861586 | -0. 650464 |
| O | 0. 233858  | -2. 291735 | -0. 597669 |
| O | 1. 800387  | -0. 554597 | 0. 272718  |
| O | 2. 479166  | -2. 607043 | 2. 756767  |
| H | 1. 643799  | -2. 096331 | 2. 892664  |
| O | 5. 429502  | -2. 998806 | 2. 111488  |
| H | 5. 116049  | -3. 320405 | 2. 972485  |
| C | 5. 243496  | -3. 447903 | -1. 109861 |
| H | 5. 599900  | -2. 919605 | -2. 007388 |



|    |           |           |           |
|----|-----------|-----------|-----------|
| H  | 6.098692  | -3.960843 | -0.658220 |
| O  | 4.290386  | -4.443180 | -1.442613 |
| H  | 3.555419  | -3.980226 | -1.876532 |
| H  | 3.923923  | -0.481299 | -1.402628 |
| S  | -2.914033 | -2.425231 | -1.308326 |
| C  | -2.498889 | -2.069870 | -3.029779 |
| H  | -3.110787 | -1.234096 | -3.373954 |
| H  | -1.440954 | -1.805903 | -3.085113 |
| H  | -2.709738 | -2.962884 | -3.621874 |
| O  | -2.065538 | -3.592102 | -0.924797 |
| O  | -4.371901 | -2.640649 | -1.245394 |
| O  | -2.492033 | -1.167549 | -0.557558 |
| Mn | -0.695971 | -0.386307 | 0.283229  |
| H  | 2.454358  | 0.153061  | 0.461247  |
| Cl | -0.275404 | -1.113632 | 2.619418  |
| Cl | -1.961696 | 1.688785  | 1.339676  |
| H  | 0.995670  | -3.276677 | 1.062994  |
| Cl | -0.223890 | 1.194438  | -1.682483 |
| C  | -5.530527 | 0.829886  | -2.792534 |
| C  | -6.040665 | 0.157386  | -1.723773 |
| C  | -4.200527 | 1.179894  | -1.058476 |
| N  | -4.375601 | 1.462126  | -2.355970 |
| H  | -5.870381 | 0.902863  | -3.813471 |
| H  | -6.894502 | -0.495211 | -1.643641 |
| H  | -3.372565 | 1.504797  | -0.430106 |
| N  | -5.203653 | 0.399776  | -0.651646 |
| C  | -3.467591 | 2.284508  | -3.158643 |
| H  | -2.457226 | 2.189253  | -2.749817 |
| H  | -3.473799 | 1.911285  | -4.184664 |
| H  | -3.793726 | 3.328723  | -3.148636 |
| C  | -5.305282 | -0.204948 | 0.693518  |
| H  | -5.297506 | -1.287242 | 0.540962  |
| H  | -4.386416 | 0.065392  | 1.218539  |
| C  | -6.543519 | 0.275150  | 1.452645  |
| H  | -6.511836 | 1.368967  | 1.547387  |
| H  | -7.453620 | 0.032684  | 0.884917  |
| C  | -6.625658 | -0.365114 | 2.845372  |
| H  | -6.640353 | -1.458299 | 2.740671  |
| H  | -5.713568 | -0.123465 | 3.406459  |
| C  | -7.854755 | 0.093257  | 3.635985  |
| H  | -7.885512 | -0.378106 | 4.624269  |
| H  | -7.848844 | 1.179916  | 3.785129  |
| H  | -8.784299 | -0.165992 | 3.114088  |
| H  | -0.506877 | -2.953130 | -0.665950 |

**IM9**

|   |            |            |            |
|---|------------|------------|------------|
| C | 4. 843019  | -3. 113219 | 1. 011611  |
| C | 4. 666407  | -2. 537696 | 2. 232170  |
| C | 2. 794009  | -2. 286670 | 1. 081619  |
| N | 3. 660721  | -2. 950346 | 0. 313712  |
| H | 5. 696364  | -3. 611079 | 0. 579530  |
| H | 5. 336146  | -2. 443012 | 3. 071942  |
| H | 1. 781555  | -1. 996211 | 0. 818822  |
| N | 3. 380454  | -2. 030575 | 2. 260338  |
| C | 3. 412620  | -3. 378392 | -1. 067799 |
| H | 3. 687076  | -4. 431329 | -1. 166055 |
| H | 2. 352217  | -3. 243740 | -1. 295361 |
| H | 4. 014812  | -2. 753882 | -1. 730153 |
| C | 2. 750824  | -1. 321042 | 3. 390243  |
| H | 1. 773093  | -1. 780020 | 3. 554139  |
| H | 3. 380354  | -1. 525458 | 4. 261372  |
| C | 2. 545707  | 0. 184676  | 3. 191095  |
| H | 2. 007578  | 0. 520861  | 4. 085303  |
| H | 1. 851701  | 0. 344908  | 2. 360756  |
| C | 3. 804833  | 1. 051068  | 3. 028667  |
| H | 3. 710261  | 1. 986026  | 3. 588195  |
| H | 4. 728752  | 0. 565776  | 3. 358068  |
| S | 4. 115954  | 1. 631096  | 1. 334628  |
| O | 2. 829138  | 2. 052373  | 0. 752994  |
| O | 5. 204785  | 2. 601626  | 1. 391221  |
| O | 4. 602913  | 0. 259447  | 0. 682981  |
| C | -0. 774702 | 3. 959681  | -0. 974795 |
| C | 0. 169360  | 2. 794559  | -1. 354940 |
| C | -0. 189516 | 2. 176366  | -2. 687038 |
| C | -2. 529003 | 3. 021717  | 0. 671342  |
| C | -2. 259484 | 3. 539341  | -0. 759236 |
| H | -0. 256321 | 2. 868092  | -3. 538614 |
| H | -0. 376249 | 4. 397161  | -0. 043106 |
| H | -1. 680207 | 2. 392977  | 0. 964505  |
| H | -2. 503309 | 2. 728161  | -1. 457498 |
| O | -3. 752120 | 2. 289082  | 0. 743110  |
| O | -0. 397347 | 0. 980957  | -2. 841587 |
| O | 0. 195926  | 1. 788674  | -0. 348247 |
| O | -0. 690915 | 4. 895761  | -2. 032556 |
| H | -1. 569853 | 5. 329361  | -2. 026951 |
| O | -3. 079859 | 4. 655352  | -1. 124855 |
| H | -3. 496989 | 5. 009901  | -0. 310513 |
| C | -2. 705037 | 4. 141437  | 1. 701521  |
| H | -2. 708829 | 3. 711592  | 2. 712240  |

|    |           |           |           |
|----|-----------|-----------|-----------|
| H  | -1.902279 | 4.881928  | 1.644505  |
| O  | -3.933855 | 4.841141  | 1.457780  |
| H  | -4.586714 | 4.126897  | 1.325030  |
| H  | -3.660662 | 1.511782  | 0.148690  |
| S  | 2.825788  | 0.156603  | -2.265915 |
| C  | 2.575663  | -0.745978 | -3.801117 |
| H  | 3.350577  | -0.436132 | -4.504871 |
| H  | 2.620688  | -1.818153 | -3.609441 |
| H  | 1.585228  | -0.482733 | -4.176390 |
| O  | 1.809275  | -0.379557 | -1.284309 |
| O  | 2.676624  | 1.587891  | -2.580019 |
| O  | 4.210021  | -0.234571 | -1.791537 |
| Mn | -0.392488 | -0.432441 | -1.038498 |
| Cl | -0.237507 | -2.761791 | -1.958235 |
| Cl | -0.322791 | -1.100511 | 1.404507  |
| C  | -5.348082 | -3.722382 | -0.927407 |
| C  | -5.321261 | -3.489516 | 0.413410  |
| C  | -3.287930 | -3.139377 | -0.378195 |
| N  | -4.066409 | -3.507100 | -1.402212 |
| H  | -6.154453 | -4.018928 | -1.579375 |
| H  | -6.100407 | -3.546181 | 1.156573  |
| H  | -2.235245 | -2.900847 | -0.462507 |
| N  | -4.022721 | -3.134736 | 0.739284  |
| C  | -3.650199 | -3.515484 | -2.808363 |
| H  | -4.081758 | -2.647072 | -3.311560 |
| H  | -2.561181 | -3.444632 | -2.844393 |
| H  | -3.992292 | -4.440835 | -3.277898 |
| C  | -3.554044 | -2.669001 | 2.059440  |
| H  | -3.812635 | -3.442021 | 2.791949  |
| H  | -2.466002 | -2.587957 | 1.995685  |
| C  | -4.158635 | -1.310753 | 2.426536  |
| H  | -3.914200 | -0.599782 | 1.630110  |
| H  | -5.254653 | -1.389650 | 2.471788  |
| C  | -3.618832 | -0.788226 | 3.763169  |
| H  | -3.816224 | -1.519846 | 4.561174  |
| H  | -2.529113 | -0.690291 | 3.683555  |
| C  | -4.234603 | 0.565363  | 4.134189  |
| H  | -3.795994 | 0.961717  | 5.057135  |
| H  | -4.070987 | 1.294080  | 3.332345  |
| H  | -5.317493 | 0.480191  | 4.291035  |
| Cl | -2.890143 | -0.144184 | -1.154813 |
| H  | 1.170370  | 3.219463  | -1.498595 |
| H  | 4.438157  | 0.181424  | -0.343849 |
| H  | 1.113230  | 1.710663  | -0.013477 |

**IM10**

|   |            |            |            |
|---|------------|------------|------------|
| C | 4. 810535  | -3. 068971 | 1. 278228  |
| C | 4. 711599  | -2. 385723 | 2. 450708  |
| C | 2. 759419  | -2. 257393 | 1. 423610  |
| N | 3. 577765  | -2. 981755 | 0. 656579  |
| H | 5. 639875  | -3. 593600 | 0. 831368  |
| H | 5. 440660  | -2. 200431 | 3. 223210  |
| H | 1. 724077  | -1. 998611 | 1. 207954  |
| N | 3. 422543  | -1. 894971 | 2. 528701  |
| C | 3. 227420  | -3. 563877 | -0. 642164 |
| H | 3. 344434  | -4. 649571 | -0. 594428 |
| H | 2. 192628  | -3. 310757 | -0. 884935 |
| H | 3. 892834  | -3. 144363 | -1. 398966 |
| C | 2. 862799  | -1. 082550 | 3. 626188  |
| H | 1. 928089  | -1. 558937 | 3. 933485  |
| H | 3. 573876  | -1. 167440 | 4. 453264  |
| C | 2. 585986  | 0. 385563  | 3. 284183  |
| H | 2. 108916  | 0. 798854  | 4. 181725  |
| H | 1. 827698  | 0. 441562  | 2. 496849  |
| C | 3. 801009  | 1. 255022  | 2. 926957  |
| H | 3. 688947  | 2. 259546  | 3. 343784  |
| H | 4. 748247  | 0. 849842  | 3. 297662  |
| S | 4. 029759  | 1. 554453  | 1. 143048  |
| O | 2. 701027  | 2. 028250  | 0. 653819  |
| O | 5. 129891  | 2. 518055  | 1. 024463  |
| O | 4. 370860  | 0. 167193  | 0. 603417  |
| C | -0. 543407 | 3. 894812  | -1. 046378 |
| C | 0. 295528  | 2. 646956  | -1. 412344 |
| C | -0. 115471 | 2. 049352  | -2. 735846 |
| C | -2. 365678 | 3. 123430  | 0. 611609  |
| C | -2. 057430 | 3. 602751  | -0. 824624 |
| H | -0. 161917 | 2. 739979  | -3. 589165 |
| H | -0. 106708 | 4. 309559  | -0. 121836 |
| H | -1. 565872 | 2. 437358  | 0. 913267  |
| H | -2. 369467 | 2. 807274  | -1. 514430 |
| O | -3. 639405 | 2. 483080  | 0. 690024  |
| O | -0. 377768 | 0. 862524  | -2. 880702 |
| O | 0. 239516  | 1. 644370  | -0. 406459 |
| O | -0. 383080 | 4. 805472  | -2. 117687 |
| H | -1. 218201 | 5. 318044  | -2. 112196 |
| O | -2. 781906 | 4. 779177  | -1. 200909 |
| H | -3. 177886 | 5. 167841  | -0. 391590 |
| C | -2. 458244 | 4. 264469  | 1. 628546  |
| H | -2. 496932 | 3. 847424  | 2. 643745  |

|    |           |           |           |
|----|-----------|-----------|-----------|
| H  | -1.600974 | 4.940691  | 1.565746  |
| O  | -3.629195 | 5.054414  | 1.374195  |
| H  | -4.338031 | 4.393367  | 1.255475  |
| H  | -3.602319 | 1.688841  | 0.113701  |
| S  | 2.832688  | -0.104375 | -2.373156 |
| C  | 2.740466  | -1.188478 | -3.797017 |
| H  | 3.559037  | -0.936782 | -4.473302 |
| H  | 2.792130  | -2.226236 | -3.469009 |
| H  | 1.772933  | -0.999441 | -4.265895 |
| O  | 1.828625  | -0.547471 | -1.372634 |
| O  | 2.763003  | 1.280188  | -2.840628 |
| O  | 4.262977  | -0.471760 | -1.809014 |
| Mn | -0.479419 | -0.472762 | -1.026864 |
| Cl | -0.351624 | -2.781875 | -1.958598 |
| Cl | -0.385525 | -1.127503 | 1.395885  |
| C  | -5.493675 | -3.604347 | -0.859297 |
| C  | -5.462003 | -3.341772 | 0.475947  |
| C  | -3.420170 | -3.061540 | -0.320444 |
| N  | -4.206755 | -3.431903 | -1.337313 |
| H  | -6.306683 | -3.895502 | -1.505420 |
| H  | -6.242773 | -3.361990 | 1.219316  |
| H  | -2.362762 | -2.848577 | -0.407145 |
| N  | -4.155559 | -3.012451 | 0.795558  |
| C  | -3.791516 | -3.482361 | -2.742931 |
| H  | -4.200587 | -2.614211 | -3.264991 |
| H  | -2.701098 | -3.440789 | -2.782128 |
| H  | -4.158514 | -4.408479 | -3.191620 |
| C  | -3.677618 | -2.526591 | 2.105510  |
| H  | -3.964362 | -3.270922 | 2.856841  |
| H  | -2.587381 | -2.483340 | 2.045107  |
| C  | -4.239113 | -1.139606 | 2.432031  |
| H  | -3.978539 | -0.462808 | 1.611175  |
| H  | -5.336705 | -1.183669 | 2.485275  |
| C  | -3.674778 | -0.591319 | 3.748213  |
| H  | -3.896161 | -1.287098 | 4.571501  |
| H  | -2.582386 | -0.537363 | 3.662523  |
| C  | -4.237705 | 0.796505  | 4.073864  |
| H  | -3.786495 | 1.203247  | 4.986119  |
| H  | -4.042296 | 1.493736  | 3.251262  |
| H  | -5.323573 | 0.758931  | 4.228765  |
| Cl | -2.946730 | -0.071220 | -1.149105 |
| H  | 1.331254  | 2.984000  | -1.554414 |
| H  | 4.343989  | -0.113548 | -0.802061 |
| H  | 1.121231  | 1.615983  | 0.043585  |

**TS<sub>10-11</sub>**

|   |            |            |            |
|---|------------|------------|------------|
| C | 4. 731298  | -2. 865767 | 1. 933679  |
| C | 4. 541509  | -1. 966848 | 2. 937670  |
| C | 2. 618164  | -2. 212476 | 1. 874221  |
| N | 3. 515583  | -3. 009365 | 1. 288461  |
| H | 5. 611477  | -3. 405444 | 1. 622355  |
| H | 5. 227090  | -1. 573964 | 3. 671499  |
| H | 1. 574922  | -2. 075534 | 1. 576944  |
| N | 3. 215066  | -1. 579114 | 2. 891764  |
| C | 3. 242246  | -3. 894711 | 0. 152845  |
| H | 3. 344282  | -4. 935844 | 0. 469699  |
| H | 2. 230027  | -3. 704150 | -0. 203332 |
| H | 3. 949914  | -3. 665881 | -0. 645323 |
| C | 2. 555922  | -0. 610097 | 3. 788635  |
| H | 1. 630790  | -1. 075453 | 4. 138290  |
| H | 3. 222288  | -0. 496246 | 4. 648886  |
| C | 2. 230439  | 0. 748297  | 3. 157927  |
| H | 1. 691391  | 1. 303850  | 3. 935105  |
| H | 1. 511774  | 0. 606529  | 2. 344024  |
| C | 3. 436768  | 1. 581600  | 2. 692346  |
| H | 3. 324972  | 2. 631395  | 2. 975437  |
| H | 4. 388223  | 1. 229817  | 3. 104979  |
| S | 3. 650190  | 1. 620313  | 0. 885135  |
| O | 2. 343130  | 2. 201979  | 0. 396931  |
| O | 4. 824653  | 2. 453790  | 0. 609253  |
| O | 3. 801057  | 0. 164117  | 0. 513330  |
| C | 0. 072776  | 3. 370944  | -1. 961162 |
| C | 0. 077029  | 1. 864573  | -2. 020932 |
| C | -0. 338729 | 1. 097610  | -3. 163650 |
| C | -1. 245923 | 3. 570800  | 0. 292593  |
| C | -1. 222944 | 3. 853128  | -1. 244918 |
| H | -0. 886635 | 1. 651592  | -3. 934539 |
| H | 0. 948317  | 3. 712612  | -1. 385678 |
| H | -0. 385639 | 2. 951907  | 0. 578228  |
| H | -2. 074175 | 3. 320457  | -1. 692775 |
| O | -2. 466378 | 2. 947065  | 0. 682279  |
| O | -0. 411720 | -0. 205343 | -3. 106939 |
| O | 0. 478223  | 1. 165183  | -0. 992437 |
| O | 0. 097878  | 3. 871675  | -3. 280241 |
| H | -0. 302460 | 4. 758883  | -3. 216369 |
| O | -1. 289838 | 5. 237872  | -1. 578623 |
| H | -1. 911611 | 5. 656845  | -0. 945495 |
| C | -1. 208313 | 4. 860302  | 1. 112256  |
| H | -1. 135360 | 4. 610658  | 2. 178829  |

|    |           |           |           |
|----|-----------|-----------|-----------|
| H  | -0.359705 | 5.488943  | 0.834356  |
| O  | -2.398148 | 5.620427  | 0.858166  |
| H  | -3.115405 | 4.961674  | 0.926521  |
| H  | -2.581101 | 2.101303  | 0.189039  |
| S  | 2.723793  | -0.968934 | -2.334777 |
| C  | 2.821732  | -2.089162 | -3.725538 |
| H  | 3.648363  | -1.781709 | -4.367578 |
| H  | 2.953401  | -3.108008 | -3.359695 |
| H  | 1.863493  | -1.992382 | -4.241386 |
| O  | 1.702401  | -1.480346 | -1.395585 |
| O  | 2.640252  | 0.405201  | -2.825422 |
| O  | 4.163616  | -1.207932 | -1.658303 |
| Mn | -0.671572 | -1.080133 | -1.252372 |
| Cl | -1.179971 | -3.417064 | -1.704684 |
| Cl | -0.482361 | -1.311478 | 1.283796  |
| C  | -6.168806 | -2.457033 | -0.167550 |
| C  | -5.940775 | -2.140414 | 1.136591  |
| C  | -3.985011 | -2.481372 | 0.166179  |
| N  | -4.935537 | -2.675447 | -0.754668 |
| H  | -7.087717 | -2.547163 | -0.724893 |
| H  | -6.623389 | -1.904386 | 1.937190  |
| H  | -2.922464 | -2.579816 | -0.011322 |
| N  | -4.569731 | -2.169198 | 1.328076  |
| C  | -4.685207 | -2.898392 | -2.183075 |
| H  | -4.779187 | -1.945568 | -2.709648 |
| H  | -3.666396 | -3.273457 | -2.302783 |
| H  | -5.409878 | -3.623407 | -2.560180 |
| C  | -3.853393 | -1.751614 | 2.548916  |
| H  | -4.270705 | -2.320494 | 3.387369  |
| H  | -2.807541 | -2.034995 | 2.409413  |
| C  | -3.958575 | -0.239960 | 2.770657  |
| H  | -3.607349 | 0.261134  | 1.862263  |
| H  | -5.010895 | 0.044329  | 2.916802  |
| C  | -3.121029 | 0.221062  | 3.969620  |
| H  | -3.449314 | -0.300211 | 4.881602  |
| H  | -2.077559 | -0.069684 | 3.794062  |
| C  | -3.204959 | 1.737427  | 4.175569  |
| H  | -2.574969 | 2.059210  | 5.013200  |
| H  | -2.877263 | 2.266495  | 3.273632  |
| H  | -4.233102 | 2.052500  | 4.394896  |
| Cl | -2.879757 | 0.238705  | -1.000400 |
| H  | 0.808657  | 1.520574  | -3.341520 |
| H  | 4.181054  | -0.584945 | -0.845153 |
| H  | 1.236505  | 1.571530  | -0.423439 |

**IM11**

|   |            |            |            |
|---|------------|------------|------------|
| C | 4. 700755  | -2. 770392 | 1. 700516  |
| C | 5. 586153  | -1. 783669 | 2. 001341  |
| C | 3. 561169  | -1. 046289 | 2. 474464  |
| N | 3. 444186  | -2. 294230 | 2. 013689  |
| H | 4. 840016  | -3. 741706 | 1. 255391  |
| H | 6. 656368  | -1. 733853 | 1. 883328  |
| H | 2. 731539  | -0. 401152 | 2. 713673  |
| N | 4. 860085  | -0. 714059 | 2. 490463  |
| C | 2. 193751  | -3. 054918 | 1. 887856  |
| H | 2. 122181  | -3. 761384 | 2. 720088  |
| H | 1. 345532  | -2. 367032 | 1. 897730  |
| H | 2. 215093  | -3. 580885 | 0. 934360  |
| C | 5. 475309  | 0. 534355  | 2. 983406  |
| H | 5. 589718  | 0. 427892  | 4. 068100  |
| H | 6. 477249  | 0. 560802  | 2. 547133  |
| C | 4. 739027  | 1. 846744  | 2. 683879  |
| H | 5. 194514  | 2. 585764  | 3. 356039  |
| H | 3. 686489  | 1. 778044  | 2. 976530  |
| C | 4. 826131  | 2. 400132  | 1. 258370  |
| H | 4. 410822  | 3. 411441  | 1. 238739  |
| H | 5. 857026  | 2. 445789  | 0. 892426  |
| S | 3. 867149  | 1. 453544  | 0. 029751  |
| O | 2. 569773  | 1. 198309  | 0. 766725  |
| O | 3. 705217  | 2. 338390  | -1. 146371 |
| O | 4. 651627  | 0. 212430  | -0. 221822 |
| C | -0. 029586 | 3. 464315  | -1. 681424 |
| C | 0. 558404  | 2. 035477  | -1. 778079 |
| C | 0. 052562  | 1. 285953  | -2. 980774 |
| C | -1. 945980 | 3. 384387  | 0. 047017  |
| C | -1. 568573 | 3. 508742  | -1. 445911 |
| H | 0. 088751  | 1. 816970  | -3. 943166 |
| H | 0. 488746  | 3. 962893  | -0. 844792 |
| H | -1. 294588 | 2. 624561  | 0. 494010  |
| H | -2. 033905 | 2. 667762  | -1. 977152 |
| O | -3. 320407 | 3. 034937  | 0. 212684  |
| O | -0. 354380 | 0. 133028  | -2. 920236 |
| O | 0. 313708  | 1. 259923  | -0. 614397 |
| O | 0. 285295  | 4. 104948  | -2. 903773 |
| H | -0. 440660 | 4. 753380  | -3. 016904 |
| O | -2. 063564 | 4. 705455  | -2. 058544 |
| H | -2. 364275 | 5. 311322  | -1. 347946 |
| C | -1. 796808 | 4. 694197  | 0. 825663  |
| H | -1. 900198 | 4. 494474  | 1. 900593  |



|    |           |           |           |
|----|-----------|-----------|-----------|
| H  | -0.824602 | 5.164871  | 0.653736  |
| O  | -2.793803 | 5.635162  | 0.400244  |
| H  | -3.620623 | 5.115693  | 0.394523  |
| H  | -3.442271 | 2.146085  | -0.187784 |
| S  | 2.446238  | -2.258003 | -1.884064 |
| C  | 3.570756  | -1.307976 | -2.894349 |
| H  | 4.154698  | -2.000377 | -3.503189 |
| H  | 2.984173  | -0.634826 | -3.520615 |
| H  | 4.198500  | -0.744626 | -2.196205 |
| O  | 1.591500  | -1.334289 | -1.108877 |
| O  | 3.200618  | -3.271799 | -1.139179 |
| O  | 1.554237  | -2.953535 | -3.024365 |
| Mn | -0.740094 | -0.716336 | -0.810712 |
| Cl | -1.132425 | -3.079657 | -1.631762 |
| Cl | -0.716036 | -1.057576 | 1.618027  |
| C  | -6.232722 | -2.988879 | 0.108119  |
| C  | -6.083694 | -2.445531 | 1.347120  |
| C  | -4.085398 | -2.563102 | 0.412310  |
| N  | -4.972493 | -3.058931 | -0.458865 |
| H  | -7.111411 | -3.329875 | -0.416146 |
| H  | -6.808594 | -2.220684 | 2.113051  |
| H  | -3.022900 | -2.474092 | 0.242123  |
| N  | -4.734299 | -2.192612 | 1.521894  |
| C  | -4.671660 | -3.483989 | -1.830161 |
| H  | -5.076439 | -2.747574 | -2.528279 |
| H  | -3.588339 | -3.533780 | -1.951727 |
| H  | -5.121059 | -4.464043 | -2.007206 |
| C  | -4.126131 | -1.487333 | 2.669086  |
| H  | -4.463865 | -1.994887 | 3.579346  |
| H  | -3.043726 | -1.606464 | 2.573964  |
| C  | -4.494073 | -0.001064 | 2.672108  |
| H  | -4.196561 | 0.427289  | 1.708634  |
| H  | -5.584264 | 0.115560  | 2.760080  |
| C  | -3.794170 | 0.755149  | 3.808372  |
| H  | -4.060164 | 0.306638  | 4.777259  |
| H  | -2.709900 | 0.634865  | 3.691233  |
| C  | -4.153469 | 2.244853  | 3.807108  |
| H  | -3.614065 | 2.782478  | 4.595378  |
| H  | -3.900371 | 2.700107  | 2.842963  |
| H  | -5.227244 | 2.395213  | 3.977588  |
| Cl | -3.099553 | 0.089921  | -1.052193 |
| H  | 0.622388  | -3.092237 | -2.656068 |
| H  | 1.155316  | 1.209382  | -0.068172 |
| H  | 1.643840  | 2.162438  | -1.928322 |

**TS<sub>11-12</sub>**

|   |            |            |            |
|---|------------|------------|------------|
| C | 4. 941895  | -2. 057692 | 2. 551989  |
| C | 4. 756117  | -0. 907424 | 3. 255758  |
| C | 2. 797475  | -1. 532921 | 2. 445129  |
| N | 3. 704329  | -2. 435333 | 2. 063480  |
| H | 5. 832703  | -2. 632909 | 2. 355825  |
| H | 5. 456406  | -0. 287449 | 3. 792485  |
| H | 1. 738647  | -1. 529244 | 2. 183716  |
| N | 3. 409654  | -0. 601587 | 3. 187981  |
| C | 3. 414902  | -3. 648586 | 1. 289286  |
| H | 3. 601273  | -4. 525759 | 1. 914362  |
| H | 2. 373016  | -3. 621263 | 0. 973857  |
| H | 4. 037915  | -3. 676373 | 0. 395169  |
| C | 2. 740454  | 0. 543523  | 3. 834565  |
| H | 1. 876627  | 0. 145712  | 4. 373891  |
| H | 3. 449669  | 0. 924483  | 4. 575544  |
| C | 2. 279274  | 1. 659712  | 2. 891691  |
| H | 1. 743676  | 2. 371576  | 3. 532100  |
| H | 1. 532010  | 1. 264829  | 2. 195128  |
| C | 3. 393378  | 2. 405060  | 2. 139642  |
| H | 3. 205044  | 3. 481240  | 2. 116564  |
| H | 4. 383513  | 2. 255661  | 2. 583829  |
| S | 3. 549621  | 1. 922122  | 0. 391433  |
| O | 2. 177052  | 2. 323622  | -0. 172757 |
| O | 4. 646137  | 2. 726996  | -0. 162918 |
| O | 3. 728337  | 0. 446379  | 0. 372190  |
| C | 0. 157115  | 2. 655737  | -2. 755808 |
| C | 0. 263129  | 1. 171187  | -2. 484003 |
| C | -0. 268130 | 0. 168739  | -3. 360588 |
| C | -1. 172793 | 3. 287991  | -0. 607845 |
| C | -1. 177338 | 3. 202122  | -2. 150620 |
| H | -0. 766372 | 0. 509185  | -4. 271863 |
| H | 1. 019415  | 3. 160714  | -2. 296310 |
| H | -0. 628038 | 2. 426433  | -0. 208204 |
| H | -1. 968301 | 2. 502468  | -2. 443202 |
| O | -2. 509572 | 3. 293281  | -0. 106647 |
| O | -0. 332907 | -1. 066727 | -2. 971492 |
| O | 0. 717451  | 0. 722738  | -1. 338591 |
| O | 0. 134642  | 2. 850519  | -4. 154361 |
| H | -0. 353054 | 3. 692116  | -4. 263598 |
| O | -1. 438034 | 4. 436147  | -2. 813811 |
| H | -1. 356319 | 5. 162035  | -2. 157026 |
| C | -0. 527101 | 4. 559334  | -0. 060065 |
| H | -0. 453372 | 4. 484177  | 1. 032446  |

|    |           |           |           |
|----|-----------|-----------|-----------|
| H  | 0.478424  | 4.706532  | -0.461227 |
| O  | -1.302490 | 5.711957  | -0.426813 |
| H  | -2.217757 | 5.482914  | -0.180311 |
| H  | -2.870231 | 2.401999  | -0.299154 |
| S  | 2.501602  | -2.471515 | -2.103247 |
| C  | 3.496046  | -1.026759 | -2.474484 |
| H  | 4.197692  | -1.298267 | -3.264790 |
| H  | 2.838119  | -0.220456 | -2.798891 |
| H  | 4.000725  | -0.716602 | -1.556221 |
| O  | 1.596297  | -2.142715 | -0.975983 |
| O  | 3.391483  | -3.619329 | -1.954291 |
| O  | 1.636214  | -2.676476 | -3.426532 |
| Mn | -0.642073 | -1.339024 | -0.792284 |
| Cl | -1.556739 | -3.568761 | -0.781855 |
| Cl | -0.371144 | -0.901797 | 1.645373  |
| C  | -6.404311 | -2.030900 | 0.587380  |
| C  | -6.065442 | -1.385994 | 1.737435  |
| C  | -4.203721 | -2.100098 | 0.784629  |
| N  | -5.227557 | -2.474578 | 0.009790  |
| H  | -7.365812 | -2.213161 | 0.133937  |
| H  | -6.676136 | -0.897751 | 2.479916  |
| H  | -3.165283 | -2.321021 | 0.571478  |
| N  | -4.685772 | -1.445426 | 1.846322  |
| C  | -5.092469 | -3.140777 | -1.290367 |
| H  | -5.355065 | -2.434962 | -2.081898 |
| H  | -4.051773 | -3.450698 | -1.409573 |
| H  | -5.754618 | -4.009343 | -1.319808 |
| C  | -3.861786 | -0.774583 | 2.871559  |
| H  | -4.208954 | -1.119346 | 3.851976  |
| H  | -2.833728 | -1.113774 | 2.720625  |
| C  | -3.935074 | 0.749746  | 2.744625  |
| H  | -3.643398 | 1.020285  | 1.724079  |
| H  | -4.970597 | 1.089446  | 2.892289  |
| C  | -3.009343 | 1.451342  | 3.746328  |
| H  | -3.274273 | 1.155124  | 4.772328  |
| H  | -1.983012 | 1.105263  | 3.570980  |
| C  | -3.071858 | 2.976780  | 3.611548  |
| H  | -2.378660 | 3.464395  | 4.306831  |
| H  | -2.811641 | 3.285761  | 2.592741  |
| H  | -4.079020 | 3.354289  | 3.829550  |
| Cl | -2.728274 | 0.133597  | -0.982802 |
| H  | 0.951743  | 0.642846  | -3.615766 |
| H  | 0.782774  | -2.117436 | -3.354918 |
| H  | 1.388957  | 1.384675  | -0.808605 |

**IM12**

|   |            |            |            |
|---|------------|------------|------------|
| C | 5. 335422  | -2. 412637 | 1. 488384  |
| C | 5. 516542  | -1. 142294 | 1. 939102  |
| C | 3. 344305  | -1. 472083 | 1. 666911  |
| N | 3. 975745  | -2. 600676 | 1. 336309  |
| H | 6. 046382  | -3. 188124 | 1. 252473  |
| H | 6. 414930  | -0. 596992 | 2. 181377  |
| H | 2. 269027  | -1. 322732 | 1. 621832  |
| N | 4. 258462  | -0. 566119 | 2. 049395  |
| C | 3. 339231  | -3. 777657 | 0. 728859  |
| H | 3. 637445  | -4. 671677 | 1. 281659  |
| H | 2. 256299  | -3. 656060 | 0. 753607  |
| H | 3. 654700  | -3. 824661 | -0. 314920 |
| C | 4. 028279  | 0. 871362  | 2. 298849  |
| H | 4. 816431  | 1. 195517  | 2. 986504  |
| H | 4. 160606  | 1. 398033  | 1. 350904  |
| C | 2. 646847  | 1. 183426  | 2. 880217  |
| H | 2. 569866  | 0. 769524  | 3. 892953  |
| H | 1. 847482  | 0. 715420  | 2. 295812  |
| C | 2. 383912  | 2. 691050  | 2. 965030  |
| H | 1. 518855  | 2. 900770  | 3. 598965  |
| H | 3. 236922  | 3. 252827  | 3. 361796  |
| S | 2. 000676  | 3. 504761  | 1. 382243  |
| O | 0. 545557  | 2. 887956  | 1. 050257  |
| O | 1. 830229  | 4. 923733  | 1. 665648  |
| O | 2. 949830  | 3. 058958  | 0. 353378  |
| C | -0. 921409 | 2. 994943  | -2. 333972 |
| C | -0. 232705 | 1. 659166  | -2. 202070 |
| C | -0. 227082 | 0. 726295  | -3. 397146 |
| C | -2. 624685 | 2. 697045  | -0. 391157 |
| C | -2. 431235 | 2. 828203  | -1. 917839 |
| H | -1. 239795 | 0. 682522  | -3. 810649 |
| H | -0. 430269 | 3. 712620  | -1. 657383 |
| H | -1. 794075 | 2. 112389  | 0. 017378  |
| H | -2. 798937 | 1. 905236  | -2. 379136 |
| O | -3. 860197 | 2. 046585  | -0. 096818 |
| O | 0. 197528  | -0. 572081 | -3. 045768 |
| O | 0. 261135  | 1. 293506  | -1. 131983 |
| O | -0. 859859 | 3. 422097  | -3. 675044 |
| H | -1. 663460 | 3. 971017  | -3. 784732 |
| O | -3. 135093 | 3. 907571  | -2. 520237 |
| H | -3. 464404 | 4. 496468  | -1. 805195 |
| C | -2. 685446 | 4. 038135  | 0. 338712  |
| H | -2. 691831 | 3. 864619  | 1. 421641  |

|    |           |           |           |
|----|-----------|-----------|-----------|
| H  | -1.826259 | 4.670603  | 0.101210  |
| O  | -3.859086 | 4.765463  | -0.058724 |
| H  | -4.589988 | 4.126527  | 0.033122  |
| H  | -3.749762 | 1.118931  | -0.396448 |
| S  | 3.364563  | -0.931672 | -1.977344 |
| C  | 4.271956  | 0.614562  | -1.778172 |
| H  | 4.973871  | 0.699885  | -2.610201 |
| H  | 3.572422  | 1.451272  | -1.770704 |
| H  | 4.819508  | 0.580480  | -0.834595 |
| O  | 2.281510  | -0.883268 | -0.911014 |
| O  | 4.334920  | -2.022167 | -1.757493 |
| O  | 2.774682  | -0.860311 | -3.352679 |
| Mn | 0.069736  | -1.192065 | -0.900391 |
| Cl | 0.086873  | -3.628119 | -0.976766 |
| Cl | -0.020495 | -0.899829 | 1.585524  |
| C  | -5.050153 | -4.091528 | 0.140183  |
| C  | -5.038709 | -3.460594 | 1.346489  |
| C  | -3.001798 | -3.342489 | 0.496779  |
| N  | -3.766887 | -4.013417 | -0.371196 |
| H  | -5.846718 | -4.585121 | -0.393803 |
| H  | -5.823757 | -3.300659 | 2.068045  |
| H  | -1.949859 | -3.133364 | 0.353027  |
| N  | -3.747294 | -3.004566 | 1.554470  |
| C  | -3.335193 | -4.450385 | -1.703607 |
| H  | -3.726494 | -3.755483 | -2.450328 |
| H  | -2.243959 | -4.432817 | -1.735352 |
| H  | -3.708875 | -5.460637 | -1.885087 |
| C  | -3.290737 | -2.157642 | 2.673855  |
| H  | -3.518200 | -2.688364 | 3.605159  |
| H  | -2.206386 | -2.064144 | 2.574677  |
| C  | -3.944591 | -0.773741 | 2.635525  |
| H  | -3.748623 | -0.325522 | 1.655228  |
| H  | -5.035134 | -0.872557 | 2.738459  |
| C  | -3.400234 | 0.146977  | 3.734964  |
| H  | -3.522624 | -0.329142 | 4.719256  |
| H  | -2.322169 | 0.276625  | 3.577889  |
| C  | -4.096122 | 1.512185  | 3.729825  |
| H  | -3.650301 | 2.188673  | 4.467687  |
| H  | -4.018972 | 1.979654  | 2.741751  |
| H  | -5.162887 | 1.415706  | 3.968614  |
| Cl | -2.480499 | -0.714970 | -1.182104 |
| H  | 1.163740  | -0.697146 | -3.285174 |
| H  | 0.565634  | 2.267557  | 0.263568  |
| H  | 0.414619  | 1.169435  | -4.169955 |

**IM13**

|   |            |            |            |
|---|------------|------------|------------|
| C | 1. 087730  | 5. 300525  | 0. 328714  |
| C | 0. 617644  | 4. 919577  | -0. 888718 |
| C | 0. 116701  | 3. 326467  | 0. 563069  |
| N | 0. 765140  | 4. 294266  | 1. 221821  |
| H | 1. 633729  | 6. 179280  | 0. 632816  |
| H | 0. 692843  | 5. 399292  | -1. 850269 |
| H | -0. 252286 | 2. 407267  | 1. 005425  |
| N | 0. 013448  | 3. 685844  | -0. 722946 |
| C | 1. 104067  | 4. 277630  | 2. 648551  |
| H | 0. 951823  | 3. 265095  | 3. 023972  |
| H | 2. 154281  | 4. 555627  | 2. 761184  |
| H | 0. 473029  | 4. 991903  | 3. 184753  |
| C | -0. 644637 | 2. 886647  | -1. 775999 |
| H | -0. 977347 | 1. 951078  | -1. 321363 |
| H | -1. 540637 | 3. 438965  | -2. 077814 |
| C | 0. 215547  | 2. 625785  | -3. 019848 |
| H | 0. 622272  | 3. 560763  | -3. 421445 |
| H | -0. 485193 | 2. 241941  | -3. 769734 |
| C | 1. 328172  | 1. 575983  | -2. 930573 |
| H | 0. 985529  | 0. 651858  | -2. 454272 |
| H | 1. 665493  | 1. 322184  | -3. 940481 |
| S | 2. 860833  | 2. 089134  | -2. 115052 |
| O | 2. 538274  | 1. 984270  | -0. 541423 |
| O | 3. 881544  | 1. 087470  | -2. 467487 |
| O | 3. 117158  | 3. 501355  | -2. 385822 |
| C | 3. 744276  | -1. 290634 | 1. 292313  |
| C | 2. 489248  | -1. 477375 | 0. 440339  |
| C | 1. 883786  | -2. 861271 | 0. 393863  |
| C | 5. 445305  | -1. 281633 | -0. 636396 |
| C | 5. 040116  | -1. 896921 | 0. 700240  |
| H | 2. 579822  | -3. 506545 | -0. 162257 |
| H | 3. 894698  | -0. 207841 | 1. 415554  |
| H | 5. 577040  | -0. 199151 | -0. 509462 |
| H | 4. 880383  | -2. 976129 | 0. 549525  |
| O | 4. 379886  | -1. 562252 | -1. 556041 |
| O | 0. 620130  | -2. 808278 | -0. 249329 |
| O | 1. 930162  | -0. 535540 | -0. 118283 |
| O | 3. 590839  | -1. 940586 | 2. 544167  |
| H | 2. 924749  | -1. 450072 | 3. 088460  |
| O | 6. 080875  | -1. 671316 | 1. 630731  |
| H | 5. 702432  | -1. 922261 | 2. 493062  |
| C | 6. 732400  | -1. 895388 | -1. 199418 |
| H | 7. 068187  | -1. 284281 | -2. 053962 |

|    |            |            |            |
|----|------------|------------|------------|
| H  | 7. 519357  | -1. 894789 | -0. 441071 |
| O  | 6. 512632  | -3. 241301 | -1. 588789 |
| H  | 5. 693271  | -3. 210189 | -2. 114036 |
| H  | 4. 162802  | -0. 735698 | -2. 027930 |
| S  | 0. 464640  | -0. 139082 | 3. 143601  |
| C  | -0. 950611 | -0. 114706 | 4. 248662  |
| H  | -1. 814510 | 0. 208960  | 3. 664057  |
| H  | -1. 100469 | -1. 124087 | 4. 635651  |
| H  | -0. 741792 | 0. 580700  | 5. 064363  |
| O  | 1. 629636  | -0. 617746 | 3. 936701  |
| O  | 0. 625187  | 1. 235712  | 2. 601037  |
| O  | 0. 097614  | -1. 144636 | 2. 069130  |
| Mn | -0. 985388 | -1. 205267 | 0. 252129  |
| H  | 2. 406781  | 1. 015752  | -0. 272903 |
| Cl | -2. 321022 | -3. 253723 | 0. 517665  |
| Cl | -2. 443918 | 0. 750016  | 0. 865642  |
| H  | 1. 815238  | -3. 229656 | 1. 421432  |
| Cl | -1. 233317 | -0. 668772 | -2. 155200 |
| C  | -5. 957665 | -3. 150939 | -1. 807625 |
| C  | -6. 542892 | -2. 389592 | -0. 842418 |
| C  | -4. 503130 | -1. 609543 | -1. 182583 |
| N  | -4. 689061 | -2. 641057 | -2. 013454 |
| H  | -6. 321830 | -4. 007288 | -2. 352716 |
| H  | -7. 520538 | -2. 446039 | -0. 390684 |
| H  | -3. 599382 | -1. 018868 | -1. 113069 |
| N  | -5. 618853 | -1. 431285 | -0. 464929 |
| C  | -3. 645898 | -3. 241862 | -2. 852284 |
| H  | -2. 851774 | -2. 507764 | -2. 999341 |
| H  | -3. 232218 | -4. 107085 | -2. 329575 |
| H  | -4. 086826 | -3. 533584 | -3. 808016 |
| C  | -5. 809365 | -0. 392107 | 0. 564544  |
| H  | -6. 472318 | -0. 821921 | 1. 321672  |
| H  | -4. 830785 | -0. 211029 | 1. 017336  |
| C  | -6. 383151 | 0. 906391  | -0. 008313 |
| H  | -5. 695756 | 1. 284982  | -0. 775426 |
| H  | -7. 343690 | 0. 706754  | -0. 504418 |
| C  | -6. 563437 | 1. 967054  | 1. 085736  |
| H  | -7. 232915 | 1. 577886  | 1. 866136  |
| H  | -5. 593413 | 2. 145912  | 1. 566405  |
| C  | -7. 123388 | 3. 285396  | 0. 542612  |
| H  | -7. 239872 | 4. 024376  | 1. 342856  |
| H  | -6. 455961 | 3. 715316  | -0. 213776 |
| H  | -8. 105838 | 3. 140999  | 0. 076307  |
| H  | 0. 077969  | -3. 578106 | 0. 008246  |

**TS<sub>13-14</sub>**

|   |            |            |            |
|---|------------|------------|------------|
| C | 1. 542556  | 5. 337081  | 0. 100103  |
| C | 0. 959676  | 4. 997978  | -1. 079902 |
| C | 0. 430328  | 3. 449303  | 0. 407469  |
| N | 1. 197539  | 4. 360732  | 1. 017519  |
| H | 2. 177475  | 6. 167956  | 0. 363237  |
| H | 0. 999573  | 5. 475849  | -2. 044680 |
| H | 0. 025499  | 2. 560305  | 0. 878292  |
| N | 0. 265464  | 3. 820237  | -0. 867093 |
| C | 1. 646425  | 4. 306504  | 2. 411339  |
| H | 1. 365895  | 3. 336507  | 2. 823279  |
| H | 2. 733516  | 4. 412264  | 2. 434389  |
| H | 1. 183501  | 5. 119208  | 2. 978154  |
| C | -0. 489614 | 3. 068024  | -1. 888523 |
| H | -0. 886607 | 2. 169551  | -1. 408788 |
| H | -1. 342849 | 3. 693570  | -2. 171597 |
| C | 0. 327697  | 2. 729607  | -3. 144603 |
| H | 0. 860081  | 3. 614865  | -3. 511924 |
| H | -0. 412648 | 2. 473727  | -3. 912041 |
| C | 1. 289342  | 1. 540892  | -3. 071451 |
| H | 0. 793682  | 0. 657132  | -2. 657851 |
| H | 1. 626942  | 1. 294019  | -4. 082642 |
| S | 2. 836825  | 1. 784462  | -2. 160553 |
| O | 2. 493343  | 1. 809525  | -0. 679378 |
| O | 3. 617428  | 0. 529553  | -2. 484537 |
| O | 3. 447786  | 3. 033460  | -2. 632830 |
| C | 3. 862557  | -1. 064339 | 1. 208624  |
| C | 2. 598705  | -1. 394553 | 0. 393227  |
| C | 1. 959029  | -2. 739609 | 0. 677141  |
| C | 4. 924905  | -1. 767202 | -0. 895155 |
| C | 5. 016914  | -1. 882743 | 0. 621674  |
| H | 2. 644212  | -3. 540867 | 0. 377733  |
| H | 4. 075094  | 0. 008051  | 1. 072312  |
| H | 5. 415947  | -0. 845907 | -1. 222846 |
| H | 4. 871267  | -2. 929192 | 0. 926053  |
| O | 3. 492317  | -1. 646037 | -1. 173513 |
| O | 0. 722865  | -2. 821745 | -0. 010744 |
| O | 1. 721882  | -0. 464760 | 0. 117525  |
| O | 3. 766641  | -1. 434887 | 2. 558363  |
| H | 3. 067392  | -0. 921085 | 3. 039437  |
| O | 6. 280036  | -1. 413881 | 1. 045001  |
| H | 6. 279636  | -1. 483348 | 2. 014569  |
| C | 5. 449548  | -2. 977547 | -1. 662511 |
| H | 5. 472295  | -2. 751168 | -2. 738209 |



|    |           |           |           |
|----|-----------|-----------|-----------|
| H  | 6.473334  | -3.183764 | -1.334684 |
| O  | 4.683826  | -4.142218 | -1.395433 |
| H  | 3.797249  | -3.974305 | -1.755000 |
| H  | 3.375794  | -0.783400 | -1.734989 |
| S  | 0.513422  | 0.079139  | 3.210434  |
| C  | -0.814147 | 0.333934  | 4.392269  |
| H  | -1.695284 | 0.641853  | 3.825461  |
| H  | -0.997956 | -0.608093 | 4.911630  |
| H  | -0.509625 | 1.108524  | 5.099248  |
| O  | 1.708583  | -0.362278 | 3.984007  |
| O  | 0.715822  | 1.364937  | 2.491033  |
| O  | 0.007302  | -1.025049 | 2.307079  |
| Mn | -0.904688 | -1.100503 | 0.387306  |
| H  | 2.101322  | 0.480021  | -0.068566 |
| Cl | -2.215359 | -3.157244 | 0.798433  |
| Cl | -2.323422 | 0.927176  | 0.804106  |
| H  | 1.821392  | -2.778241 | 1.763057  |
| Cl | -1.154573 | -0.814350 | -2.055300 |
| C  | -5.876855 | -3.214332 | -1.449560 |
| C  | -6.452329 | -2.338680 | -0.580154 |
| C  | -4.412235 | -1.614894 | -1.027233 |
| N  | -4.608275 | -2.738996 | -1.724786 |
| H  | -6.247758 | -4.129380 | -1.883355 |
| H  | -7.426544 | -2.335810 | -0.117597 |
| H  | -3.503429 | -1.026516 | -1.036688 |
| N  | -5.521993 | -1.345645 | -0.328641 |
| C  | -3.577649 | -3.436603 | -2.501771 |
| H  | -2.764547 | -2.737406 | -2.705039 |
| H  | -3.189092 | -4.263369 | -1.903537 |
| H  | -4.021431 | -3.797507 | -3.432525 |
| C  | -5.706725 | -0.180532 | 0.556687  |
| H  | -6.311242 | -0.522517 | 1.402635  |
| H  | -4.715040 | 0.096704  | 0.925980  |
| C  | -6.365471 | 1.001343  | -0.159540 |
| H  | -5.740350 | 1.285697  | -1.015848 |
| H  | -7.343741 | 0.701253  | -0.561940 |
| C  | -6.527539 | 2.204409  | 0.779063  |
| H  | -7.136236 | 1.912060  | 1.646637  |
| H  | -5.540725 | 2.482107  | 1.170644  |
| C  | -7.170021 | 3.410902  | 0.087846  |
| H  | -7.271661 | 4.254075  | 0.779821  |
| H  | -6.564459 | 3.748222  | -0.761897 |
| H  | -8.170403 | 3.168691  | -0.291762 |
| H  | 0.148425  | -3.501195 | 0.395799  |

**IM14**

|   |            |            |            |
|---|------------|------------|------------|
| C | 1. 350080  | 5. 356507  | 0. 092281  |
| C | 0. 778317  | 5. 017948  | -1. 093940 |
| C | 0. 312226  | 3. 420429  | 0. 366163  |
| N | 1. 046574  | 4. 349580  | 0. 990523  |
| H | 1. 947270  | 6. 209655  | 0. 372477  |
| H | 0. 786521  | 5. 521947  | -2. 046668 |
| H | -0. 066508 | 2. 509441  | 0. 820282  |
| N | 0. 133453  | 3. 807665  | -0. 903242 |
| C | 1. 489464  | 4. 291236  | 2. 387860  |
| H | 1. 294175  | 3. 285381  | 2. 763690  |
| H | 2. 561854  | 4. 495630  | 2. 423304  |
| H | 0. 950329  | 5. 039881  | 2. 975020  |
| C | -0. 600928 | 3. 051442  | -1. 936779 |
| H | -0. 990030 | 2. 144235  | -1. 465992 |
| H | -1. 459086 | 3. 666676  | -2. 226462 |
| C | 0. 233328  | 2. 733667  | -3. 186524 |
| H | 0. 741730  | 3. 629779  | -3. 562254 |
| H | -0. 492699 | 2. 447027  | -3. 955989 |
| C | 1. 217156  | 1. 561779  | -3. 103225 |
| H | 0. 747808  | 0. 681080  | -2. 649415 |
| H | 1. 547359  | 1. 291283  | -4. 110318 |
| S | 2. 764967  | 1. 876259  | -2. 230329 |
| O | 2. 536237  | 1. 933308  | -0. 769725 |
| O | 3. 571084  | 0. 528400  | -2. 569842 |
| O | 3. 461971  | 2. 987672  | -2. 868088 |
| C | 3. 772041  | -1. 191163 | 1. 414453  |
| C | 2. 662869  | -1. 495275 | 0. 365158  |
| C | 1. 954511  | -2. 821704 | 0. 656907  |
| C | 4. 853894  | -1. 697907 | -0. 666574 |
| C | 4. 988868  | -1. 911109 | 0. 835865  |
| H | 2. 626471  | -3. 649556 | 0. 404849  |
| H | 3. 961832  | -0. 103913 | 1. 383019  |
| H | 5. 360711  | -0. 763511 | -0. 939802 |
| H | 4. 899379  | -2. 980579 | 1. 076229  |
| O | 3. 421076  | -1. 541056 | -0. 901230 |
| O | 0. 755194  | -2. 884824 | -0. 113907 |
| O | 1. 675584  | -0. 527714 | 0. 218913  |
| O | 3. 565732  | -1. 656918 | 2. 716515  |
| H | 2. 875326  | -1. 124266 | 3. 184310  |
| O | 6. 229000  | -1. 397956 | 1. 284832  |
| H | 6. 230386  | -1. 511531 | 2. 249710  |
| C | 5. 353494  | -2. 837121 | -1. 551042 |
| H | 5. 338281  | -2. 516734 | -2. 604028 |

|    |           |           |           |
|----|-----------|-----------|-----------|
| H  | 6.389981  | -3.065618 | -1.282307 |
| O  | 4.601847  | -4.025343 | -1.366796 |
| H  | 3.691546  | -3.807048 | -1.627566 |
| H  | 3.332869  | -0.219540 | -1.932396 |
| S  | 0.434496  | 0.093617  | 3.194404  |
| C  | -0.923391 | 0.543793  | 4.282033  |
| H  | -1.754414 | 0.858911  | 3.647519  |
| H  | -1.197188 | -0.335396 | 4.867858  |
| H  | -0.596427 | 1.352940  | 4.938715  |
| O  | 1.556993  | -0.354761 | 4.063993  |
| O  | 0.765558  | 1.307227  | 2.389697  |
| O  | -0.118709 | -1.034946 | 2.357531  |
| Mn | -0.748852 | -1.136673 | 0.310455  |
| H  | 2.040972  | 0.380798  | 0.239002  |
| Cl | -2.194903 | -3.139371 | 0.661146  |
| Cl | -2.224431 | 0.939443  | 0.647244  |
| H  | 1.735064  | -2.850662 | 1.726948  |
| Cl | -1.048581 | -0.830051 | -2.161586 |
| C  | -5.822974 | -3.149077 | -1.623650 |
| C  | -6.363381 | -2.344353 | -0.668061 |
| C  | -4.316547 | -1.622529 | -1.088917 |
| N  | -4.549685 | -2.674625 | -1.881416 |
| H  | -6.220886 | -4.013992 | -2.130228 |
| H  | -7.328293 | -2.364271 | -0.186829 |
| H  | -3.398941 | -1.050018 | -1.064873 |
| N  | -5.408075 | -1.395213 | -0.348336 |
| C  | -3.539591 | -3.331967 | -2.717372 |
| H  | -2.723340 | -2.628950 | -2.893360 |
| H  | -3.147004 | -4.196037 | -2.176561 |
| H  | -4.002676 | -3.635414 | -3.659115 |
| C  | -5.541348 | -0.328432 | 0.660649  |
| H  | -6.177842 | -0.729278 | 1.455579  |
| H  | -4.542583 | -0.149845 | 1.066788  |
| C  | -6.118607 | 0.964725  | 0.080037  |
| H  | -5.454583 | 1.314611  | -0.720191 |
| H  | -7.100857 | 0.768677  | -0.373508 |
| C  | -6.239319 | 2.052403  | 1.155402  |
| H  | -6.879167 | 1.690319  | 1.972965  |
| H  | -5.246517 | 2.228985  | 1.587859  |
| C  | -6.805850 | 3.365436  | 0.606336  |
| H  | -6.877960 | 4.124521  | 1.393065  |
| H  | -6.166356 | 3.768287  | -0.188149 |
| H  | -7.809494 | 3.224132  | 0.186346  |
| H  | 0.163157  | -3.578517 | 0.238019  |
